1     **Downsizing in plants - UV induces pronounced morphological changes in**  
2                                    **cucumber in the absence of stress**

3  
4  
5     Minjie Qian<sup>1,2</sup>, Eva Rosenqvist<sup>3</sup>, Els Prinsen<sup>4</sup>, Frauke Pescheck<sup>5</sup>, Ann-Marie Flygare<sup>6</sup>, Irina  
6                                    Kalbina<sup>1</sup>, Marcel A.K. Jansen<sup>7</sup>, Åke Strid<sup>1\*</sup>

- 7  
8  
9     1. Örebro Life Science Center, School of Science and Technology, Örebro University, SE-  
10         70182 Örebro, Sweden  
11     2. College of Horticulture, Hainan University, Haikou 570228, China  
12     3. Section of Crop Sciences, Department of Plant and Environmental Sciences, University  
13         of Copenhagen, Højbakkegård Allé 9, DK-2630 Taastrup, Denmark  
14     4. Integrated Molecular Plant Physiology Research, Department of Biology, University of  
15         Antwerpen, Groenenborgerlaan 171, B-2020 Antwerpen, Belgium  
16     5. Botanical Institute, Christian-Albrechts-University Kiel, Olshausenstraße 40, 24098 Kiel  
17     6. Statistics Unit, School of Business, Örebro University, SE-70182 Örebro, Sweden  
18     7. School of Biological, Earth and Environmental Sciences, Environmental Research  
19         Institute, University College Cork, North Mall, Cork, Ireland

20  
21     \*Correspondence:

22     Åke Strid, School of Science and Technology, Örebro University, Örebro Sweden. E-mail:  
23     [ake.strid@oru.se](mailto:ake.strid@oru.se)

24  
25     Funding information:

26     The Knowledge Foundation (kks.se; contract no. 20130164); The Swedish Research Council  
27     Formas (formas.se/en; Contract no. 942-2015-516); The Örebro University's Faculty for  
28     Business, Science and Technology; Science Foundation Ireland (S16/IA/4418); The Flemish  
29     Science Foundation (FWO, grant G000515N); China Scholarship Council (CSC no.  
30     201406320076).

31

32 **Abstract**

33

34 Ultraviolet (UV)-A- or UV-B-enrichment of growth light resulted in a stocky cucumber  
35 (*Cucumis sativus* L.) phenotype exhibiting decreased stem and petiole lengths and leaf area.  
36 Effects were larger in plants grown in UV-B- than in UV-A-enriched light. In plants grown in  
37 UV-A-enriched light, decreases in stem and petiole lengths were similar independently of  
38 tissue age. In the presence of UV-B radiation, stems and petioles were progressively shorter  
39 the younger the tissue. Also, plants grown under UV-A-enriched light significantly  
40 reallocated photosynthate from shoot to root and also had thicker leaves with decreased  
41 specific leaf area. Our data therefore imply different morphological plant regulatory  
42 mechanisms under UV-A and UV-B radiation. There was no evidence of stress in the UV-  
43 exposed plants, neither in photosynthetic parameters, total chlorophyll content, nor in  
44 accumulation of damaged DNA (cyclobutane pyrimidine dimers). The ABA content of the  
45 plants also was consistent with non-stress conditions. Parameters such as total leaf  
46 antioxidant activity, leaf adaxial epidermal flavonol content and foliar total UV-absorbing  
47 pigment levels revealed successful UV acclimation of the plants. Thus, the stocky UV-  
48 phenotype was displayed by healthy cucumber plants, implying a strong morphological  
49 response and regulatory adjustment as part of UV acclimation processes involving UV-A  
50 and/or UV-B photoreceptors.

51

52

53 **Keywords**

54 Antioxidant capacity; *Cucumis sativus*; Flavonoids; Growth regulation; Morphology;  
55 Ultraviolet-A; Ultraviolet-B; UV acclimation

56

## 57 1. Introduction

58  
59 The study of plant UV-responses has gradually shifted from plant stress biology in to the  
60 realm of plant regulatory responses (Jansen & Bornman, 2012). There is now good, emerging  
61 understanding of the mechanism underlying the sensing of UV-B and UV-A wavelengths by  
62 a range of dedicated plant photoreceptors, including the phototropins, cryptochromes and  
63 UVR8 (Paik & Huq, 2019). However, understanding of downstream regulatory interactions  
64 which can substantially modify UV-A and UV-B responses is only slowly emerging.

65 Nevertheless, there is consensus that both UV-B and UV-A signalling pathways are closely  
66 interacting (Rai et al., 2019; 2020), with further crosstalk with, amongst others, phytochrome  
67 signalling. For example, UV-B through UVR8, accelerates degradation of PHYTOCHROME  
68 INTERACTING FACTORS (PIFs) that are part of the phytochrome mediated elongation  
69 response to high far-red to red light ratio's (Sharma et al., 2019). As a consequence of these  
70 interactions, plant responses under natural light conditions are not always identical to those  
71 observed under controlled, artificial lighting in the laboratory. For example, Morales et al.  
72 (2013) showed that under natural, sunlight, UVR8 both positively and negatively affects UV-  
73 A-regulated gene expression and metabolite accumulation. Conversely, a high UV-A/blue  
74 light background radiation moderates UV-B-driven gene-expression.

75  
76 Understanding plant UV-responses under natural conditions is particularly important in the  
77 context of climate change. Ongoing changes in the global climate, recovery of the  
78 stratospheric ozone layer, and interactions between these two processes, are resulting in novel  
79 combinations of, amongst others, temperature, water-availability, and solar UV radiation  
80 (Bornman et al., 2019). For example, plants in the Mediterranean are predicted to be exposed  
81 to higher UV-levels, due to climate change-associated changes in cloud cover, together with  
82 increased spells of drought (Bornman et al., 2019). It has been hypothesised that UV-exposed  
83 plants will be more drought-protected. Indeed, Robson, Hartikainen & Aphalo (2015a)  
84 showed that when silver birch seedlings were exposed to a combination of natural UV and  
85 drought, wilting was less pronounced compared to that in plants which had just been exposed  
86 to drought. However, not all studies show such cross-tolerance (Rodríguez-Calzada et al.,  
87 2019), and there is still considerable uncertainty in the literature concerning the  
88 environmental relevance of cross-tolerance (Jansen et al., 2019). Nevertheless, it has been  
89 argued that a key component of any putative cross-tolerance is the UV-induced change in  
90 plant architecture, and especially a more stocky phenotype. The UV-induced phenotype is

91 characterised by shorter stems, internodes, and petioles, and a diminished leaf area, often  
92 associated with an increase in leaf thickness (Jansen, Gaba & Greenberg, 1998; Robson,  
93 Klem, Urban & Jansen, 2015b), and some of these characteristics are shared with drought-  
94 acclimated plants. Yet, major questions remain concerning the stocky UV-phenotype, and  
95 particularly the mechanism underlying the induction of such a phenotype. UV-induced stress,  
96 possibly involving reactive oxygen species (ROS; Hideg, Jansen & Strid, 2013) and/or  
97 accumulation of damaged DNA (Kang, Hidema & Kumagai, 1998), may affect plant  
98 architecture (Robson et al., 2015b). Conversely, a regulatory response mediated by a UV  
99 photoreceptor can drive architectural change. In the latter case, UV-B- and UV-A-induced  
100 responses may be different as these are driven by distinct photoreceptors.

101  
102 The aim of the current study was to investigate whether morphological changes occurred in  
103 plants as a result of supplementing photosynthetically active radiation (PAR) with additional  
104 UV-A- or UV-B-enriched light, and to ascertain if such alteration is due to known UV-  
105 induced stress factors such as reduction of photosynthetic capacity (Jordan, Strid & Wargent,  
106 2016), ROS formation (Hideg et al., 2013), DNA damage (Kalbin et al., 2001) or changes in  
107 hormonal status (Hideg & Strid, 2017). The study was carried out in cucumber (*Cucumis*  
108 *sativus* L.) a model species representing broad leaved, high biomass plants of considerable  
109 economic importance and which develops considerable phenotypic changes dependent on  
110 different wavelengths of UV (Ballaré, Barnes & Kendrick, 1991).

## 111 112 **2. Materials and Methods**

### 113 114 2.1. Plant material, growth conditions, and treatment conditions

115  
116 Cucumber seeds (*Cucumis sativus* L. cv. ‘Hi Jack’) were sown one seed per 0.25 L pot in 14-  
117 7-15 NPK fortified peat (SE Horto AB, Hammenhög, Sweden), as described previously (Qian  
118 et al., 2019; 2020). Seedlings were grown in a greenhouse under natural daylight from the  
119 roof which was supplemented with 150-200  $\mu\text{mol m}^{-2} \text{s}^{-1}$  PAR as measured 20 cm above the  
120 table using Vialox NAV-T Super 4Y high-pressure sodium lamps (Osram, Johanneshov,  
121 Sweden) for 16 h per day centered around solar noon, and only turned off when the natural  
122 irradiance reached 900  $\mu\text{mol m}^{-2} \text{s}^{-1}$ . The day/night temperature was 25/20 °C and the relative  
123 humidity was set to 80 %. Watering was done by adding water to the tray underneath the pots  
124 when the tray itself was completely dry. As soon as the cucumber seedlings had fully

125 developed cotyledons, watering was commenced using a full nutrient solution (Svegro AB,  
126 Ekerö, Sweden).

127  
128 Fourteen days after sowing, when the first true leaf of the cucumber seedlings was  
129 approximately 5 cm in diameter (about one third of the diameter of a fully developed first  
130 true leaf), UV exposure commenced. The plants were then given either supplementary UV-  
131 A-enriched or UV-B-enriched irradiation for 4 h per day (centered around solar noon) in  
132 addition to the PAR described above. Controls were simultaneously exposed to PAR only  
133 (see below) in the same chamber as the corresponding UV-treated plants. The UV-A and UV-  
134 B exposures were carried out in separate greenhouse chambers and the treatments alternated  
135 between the chambers when repeating the experiment (cf. Qian et al., 2019; 2020, for  
136 details).

137  
138 Open top, front and backside boxes (OTFB boxes), covered with Perspex on the left and right  
139 sides, were used for the different UV exposures. Each greenhouse compartment was  
140 equipped with up to six boxes, three being used for the UV treatments and three for the  
141 corresponding controls. Each OFTB box contained up to 48 plants per replicate. For the UV-  
142 A-enriched experiments, fluorescent UVA-340 tubes (Q-Lab, Cleveland, Ohio) were used for  
143 exposure, whereas for the UV-B-enriched experiments fluorescent Philips TL40/12 UV tubes  
144 (Eindhoven, The Netherlands) were employed. For the control OFTB boxes, UV-blocking  
145 Perspex was used to cover the top and all sides. For the UV-B-enriched experiment, 0.13mm  
146 cellulose acetate (Nordbergs Tekniska AB, Vallentuna, Sweden) covered the top, front and  
147 backside of the OTFB boxes with the purpose to remove any UV-C radiation emitted by the  
148 Philips TL40/12 tubes. For the UV-A-enriched experiment, the OFTB boxes were similar to  
149 the boxes used in the control experiment but without any filtering material on top.

150  
151 The spectral distribution of the light environments in the different treatments was measured  
152 using an OL756 double monochromator spectroradiometer (Optronic Laboratories, Orlando,  
153 FL, USA) 20 cm above the table. The details of doses were as described by Qian et al.  
154 (2019). Briefly, however, UV-A-enriched radiation contained  $3.6 \text{ W UV-A m}^{-2}$  and a  $45.5$   
155  $\text{mW m}^{-2}$  plant-weighted UV-B (calculated according to Yu & Björn, 1997), giving a total of  
156 plant-weighted UV-B of  $0.6 \text{ kJ m}^{-2} \text{ day}^{-1}$  during the daily four-hour exposure. The UV-B-  
157 enriched irradiation had  $83.4 \text{ mW m}^{-2}$  plant-weighted UV-B totaling  $1.23 \text{ kJ m}^{-2} \text{ day}^{-1}$  plant-  
158 weighted UV-B. This exposure also contained  $0.34 \text{ W UV-A m}^{-2}$ . The daily irradiation

159 outside in Lund, Sweden, under clear skies on a summer's day is approximately  $4.8 \text{ kJ m}^{-2}$   
160  $\text{day}^{-1}$  of plant-weighted UV-B (Yu & Björn, 1997).

161

## 162 *2.2. Morphological measurements*

163

164 Between day 0 and day 14 morphological parameters were measured. A ruler was used to  
165 measure the lengths of stems and petioles. The dry matter (DM) of shoots (separated into  
166 stems, petioles, and leaves) and roots was measured using a digital balance (accuracy 0.001  
167 g) following oven drying at  $70 \text{ }^\circ\text{C}$  for 20 h. The leaf mass fraction (LMF) was calculated as  
168  $\text{LMF} = \text{leaf DM}/\text{total shoot DM}$ . The leaf area (LA) was determined from digitized  
169 photographs using ImageJ (<https://imagej.nih.gov/ij/>). As a measure of how much leaf area a  
170 plant builds with a given amount of leaf biomass, the specific leaf area (SLA) for true leaves  
171 2, 3, and 4 from the base of the plants, as well as for all leaves combined, was calculated as  
172  $\text{SLA} = \text{LA}/\text{leaf DM}$ . For each experiment, six plants per treatment were measured, two from  
173 each of the three replicated treatment OTFB boxes and their corresponding controls. In total  
174 three independent experiments were performed.

175

## 176 *2.3. Chlorophyll fluorescence*

177

178 Chlorophyll *a* fluorescence was measured with a MINI-PAM (Walz, Effeltrich, Germany) on  
179 the 1<sup>st</sup> true leaf from the bottom of the stem on day 1, 4, 8 and 14 of UV exposure, as well as  
180 on the youngest well-developed leaf (the top leaf which was fully developed, i.e. the diameter  
181 reached approximately 15 cm) on day 15 of UV exposure. The attached leaves were fixed in  
182 a leaf clip holder (2030-B, Walz, Effeltrich, Germany) fitted with a halogen lamp (2050-HB,  
183 Walz, Effeltrich, Germany) and a heat absorbing glass filter (Calflex, Optic Balzers,  
184 Liechtenstein, Germany). The leaf was dark adapted 30 min by aluminium foil and the  
185 middle portion of the leaf was mounted in the leaf clip in a dark room.  $F_o$  and  $F_m$  were  
186 measured and the maximum photochemical efficiency of photosystem II (PSII) was  
187 calculated as  $F_v/F_m = (F_m - F_o)/F_m$ . Subsequently, the leaf was exposed to actinic PAR of 302  
188 or  $1860 \mu\text{mol m}^{-2} \text{ s}^{-1}$  for 10 mins to achieve steady-state  $F_s$  and  $F_m'$ , measured by 0.6 s  
189 saturating pulses. The operation efficiency of PSII ( $F_q'/F_m'$ ), where  $F_q' = F_m' - F_s$ , the fraction of  
190 open PSII expressed as  $q_L$ , and non-photochemical quenching (NPQ) were calculated as  
191 reviewed by Murchie and Lawson (2013). For each experiment, three plants per treatment  
192 were measured (one from each of the three replicated treatment OTFB boxes with  
193 accompanying control boxes) and in total three independent experiments were performed.

194

#### 195 *2.4. Biochemical analysis*

196

197 Upper surface chlorophyll content in the 1<sup>st</sup> true leaf (on day 1, 4, 8, and 14 of UV exposure),  
198 and the youngest well-developed leaf on day 15 of UV exposure was measured using a  
199 DUALEX<sup>®</sup> SCIENTIFIC (Force-A, Orsay, France), following chlorophyll fluorescence  
200 measurements.

201

202 Leaf adaxial epidermal flavonol content (LAEFC) in the 2<sup>nd</sup> true leaf (on day 0, 1, 3, 5, 10,  
203 and 14 of UV exposure) was measured using a DUALEX (Force-A, Orsay, France).

204 Additionally, total UV-absorbing pigments (TUAP; mostly flavonoids) were extracted from  
205 the 2<sup>nd</sup> true leaf (on day 0, 1, 3, 5, 10, and 14 of UV exposure) for quantification. Leaves  
206 were snap frozen, then stored at -80°C until used. They were then ground in liquid nitrogen  
207 using a mortar and pestle and 0.1 g leaf material was placed into micro-tubes with 1 ml  
208 acidified methanol (1% HCl, 20% H<sub>2</sub>O, 79% CH<sub>3</sub>OH) before incubation in the dark at 4°C  
209 for four days. Absorbance was recorded at 330nm using a spectrophotometer (Shimadzu  
210 UV/VIS 1800). Absorbance was normalized per leaf fresh weight. For each experiment, three  
211 plants per treatment were measured (one from each of the three replicated treatment OTFB  
212 boxes with accompanying control boxes) and in total three independent experiments were  
213 performed.

214

215 With the same sampling as for flavonoid analysis, total antioxidant capacity (TAC) was  
216 analyzed using a commercially available kit (Total Antioxidant Capacity Assay kit, Sigma-  
217 MAK187). Ground leaf tissue (0.1 g; see above) from the 2<sup>nd</sup> true leaf was extracted in 1 ml  
218 of ice cold 1 X Phosphate Buffered Saline (PBS) and following centrifugation, the  
219 supernatant was diluted 1:100 to bring values within range of kit standards. Samples were  
220 assayed according to the manufacturer's protocol, by comparing the absorbances of diluted  
221 extracts at 570 nm with Trolox standards and values normalized to tissue fresh weight.

222

#### 223 *2.5. DNA damage detection*

224

225 With replications as for flavonoid analysis, cyclobutane pyrimidine dimers were quantified  
226 using an immunoassay following the protocol from van de Poll, Eggert, Buma & Breeman  
227 (2001). First, DNA was extracted from ground leaf tissue (see above) from the 2<sup>nd</sup> true leaf  
228 from the base of the plant on day 1, 3, 5, 10, and 14 using the E.Z.N.A.<sup>®</sup> Plant DNA Kit  
229 (Omega Bio-Tek, Georgia, USA), and dissolved in 100 µl TE buffer (pH 8.0). The DNA

230 concentration was determined fluorometrically in a microplate reader (GENius, Tecan,  
231 Salzburg, Austria) using the Quantifluor dye (Promega Madison, USA). Of each sample 50  
232 ng DNA was used for the southern blot. CPDs were subsequently labelled on the membrane  
233 by using a primary antibody against CPDs produced in mouse (H3 clone 4F6, Sigma Aldrich,  
234 St. Louis, USA). Detection was conducted by peroxidase coupled to the secondary antibody  
235 (Anti-Mouse IgG (whole molecule)-Peroxidase, Sigma Aldrich) using an enhanced  
236 chemiluminescent substrate (Pierce ECL, Thermo Fisher Scientific, Waltham, USA). On  
237 each blot a CPD calibration standard was included to allow absolute quantification of CPDs  
238 Mb<sup>-1</sup> (Pescheck et al. 2014).

## 239 240 *2.6. Plant hormone analysis*

241  
242 The 2<sup>nd</sup> true leaves from the base of the plant were harvested on day 3 and day 5. Leaves  
243 from three different plants within one experiment were pooled to obtain approx. 300 mg  
244 material. Leaf tissues were snap frozen in liquid nitrogen, and kept at -80°C. All samples  
245 were then ground with a mortar and pestle in liquid nitrogen, and again kept at -80°C until  
246 used. Totally, three independent experiments generated three replicates. Each pooled sample  
247 was subdivided in separate 100 mg fractions for the extraction of the different hormone  
248 groups.

249  
250 Auxin and ABA analysis: Samples were extracted in 500 µL of 80% methanol. [C<sup>13</sup>]-IAA  
251 (100 pmol, (phenyl-<sup>13</sup>C<sub>6</sub>)-indole-3-acetic acid, 99%, Cambridge Isotopes, Tewksbury, MA,  
252 USA) and D6-ABA (150 pmol, [<sup>2</sup>H<sub>6</sub>](+)-*cis,trans*-abscisic acid, [(S)-5-[<sup>2</sup>H<sub>6</sub>](1-hydroxy-  
253 2,6,6-trimethyl-4-oxocyclohex-2-en-1-yl)-3-methyl-(2Z,4E)-pentadienoic acid], Olchemim,  
254 Olomouc, Czech Republic) were added as internal tracers. After overnight extraction,  
255 samples were centrifuged (20 min, 15,000g, 4°C, in an Eppendorf 5810R centrifuge,  
256 Eppendorf, Hamburg, Germany) and the supernatants were aliquoted in two equal parts. One  
257 aliquot was acidified using 5.0 mL of 6.0% formic acid and loaded on a reversed-phase (RP)-  
258 C18 cartridge (500 mg, BondElut Varian, Middelburg, The Netherlands). The compounds of  
259 interest (IAA, ABA, and the oxidation products IAA-OX, IAA-OH, indole-butyric acid  
260 (IBA)-OX, and IBA-OH) were eluted with 5.0 mL of diethyl ether and dried under a nitrogen  
261 stream (TurboVap LV Evaporator, Zymark, New Boston, MA, USA). The remaining aliquot  
262 was hydrolyzed in 7.0 M NaOH for 3 h at 100°C under a water-saturated nitrogen  
263 atmosphere. After hydrolysis, the samples were acidified using 2.0 M HCl, desalted on an  
264 RP-C18 cartridge (500 mg), and eluted with diethyl ether. All samples were methylated using



265 ethereal diazomethane to improve analysis sensitivity. Samples were analysed using an  
266 Acquity UPLC system linked to a TQD triple quadrupole detector (Waters, Milford, MA,  
267 USA) equipped with an electrospray interface in positive mode. Samples (6.0  $\mu\text{L}$ ) were  
268 injected on an Acquity UPLC BEH C18 RP column (1.7  $\mu\text{m}$ , 2.1  $\times$  50 mm, Waters) using a  
269 column temperature of 30°C and eluted at 0.3 mL  $\text{min}^{-1}$  with the following gradient of 0.01  
270 M ammonium acetate (solvent A) and methanol (solvent B): 0–2 min isocratic 90/10 A/B;  
271 2–4 min linear gradient to 10/90 A/B. Quantitative analysis was obtained by multiple reactant  
272 monitoring of selected transitions based on the  $\text{MH}^+$  ion (dwell time 0.02 s) and the most  
273 appropriate compound-specific product ions in combination with the compound-specific cone  
274 and collision settings. All data were processed using Masslynx/Quanlynx software V4.1  
275 (Waters). Data are expressed in picomoles per gram fresh weight ( $\text{pmol g}^{-1}$  FW).

276  
277 Gibberellin analysis: Samples were extracted overnight in 500 $\mu\text{L}$  acidified methanol pH 4.0  
278 (80/20, methanol/5.0 mM formic acid-containing butylated hydroxytoluene (3–5 crystals)).  
279 As internal tracers, D<sub>2</sub>-GA1 (C<sub>19</sub>H<sub>22</sub><sup>2</sup>H<sub>2</sub>O<sub>6</sub>), D<sub>2</sub>-GA4 (C<sub>19</sub>H<sub>22</sub><sup>2</sup>H<sub>2</sub>O<sub>5</sub>), D<sub>2</sub>-GA8 (C<sub>19</sub>H<sub>22</sub><sup>2</sup>H<sub>2</sub>O<sub>7</sub>),  
280 D<sub>2</sub>-GA9 (C<sub>19</sub>H<sub>22</sub><sup>2</sup>H<sub>2</sub>O<sub>4</sub>), D<sub>2</sub>-GA15 (C<sub>20</sub>H<sub>24</sub><sup>2</sup>H<sub>2</sub>O<sub>4</sub>), D<sub>2</sub>-GA19 (C<sub>20</sub>H<sub>24</sub><sup>2</sup>H<sub>2</sub>O<sub>6</sub>), D<sub>2</sub>-GA20  
281 (C<sub>19</sub>H<sub>22</sub><sup>2</sup>H<sub>2</sub>O<sub>5</sub>), and D<sub>2</sub>-GA29 (C<sub>19</sub>H<sub>22</sub><sup>2</sup>H<sub>2</sub>O<sub>6</sub>) (20 pmol each, Olchemim) were added. After  
282 purification on an RP-C18 cartridge (500 mg) as described above for auxins, samples were  
283 derivatized with N-(3-dimethylaminopropyl)-N'-ethylcarbodiimide hydrochloride (Sigma-  
284 Aldrich, 1.0 mg per sample, pH 4.0, 60 min, 37 °C under continuous shaking in an Eppendorf  
285 thermomixer) and analysed using a UPLC-MS/MS equipped with an electrospray interface in  
286 positive mode (ACQUITY, TQD, Waters). Samples (6.0  $\mu\text{L}$ , partial loop mode using a 10  $\mu\text{L}$   
287 sample loop) were injected on an ACQUITY BEH C18 column (2.1  $\times$  50 mm; 1.7 mm,  
288 Waters) using a column temperature of 30 °C and eluted at 450  $\mu\text{L min}^{-1}$  with the following  
289 gradient of 0.1% formic acid in water (solvent A) and 0.1% formic acid in acetonitrile  
290 (solvent B): 0–0.8 min isocratic 92/8 A/B; 0.8–5 min linear gradient to 60/40 A/B; 5–5.5 min  
291 linear gradient to 10/90 A/B. Quantitative analysis was performed by multiple reactant  
292 monitoring of selected transitions based on the  $\text{MH}^+$  ion (dwell time 0.02 s) and the most  
293 appropriate compound-specific product ions in combination with the compound-specific cone  
294 and collision settings. Transitions are grouped in specific time windows according to the  
295 compound-specific retention time in order to keep the dwell time at 0.02s. All data were  
296 processed using Masslynx/Quanlynx software V4.1 (Waters). Data are expressed in  
297 picomoles per gram fresh weight ( $\text{pmol g}^{-1}$  FW).

298

## 299 2.7. Statistical analysis

300  
301 Statistical analysis was performed using either SPSS 19.0 (IBM, Armonk, NY), STATA 14.0  
302 or Wizard for Macintosh (App Store, Apple Inc., Cupertino, CA). Morphological parameters  
303 (Figs. 1-5) were analyzed using error propagation where the standard deviation of the ratios  
304 were approximated using Taylor linearization (Taylor, 1997) as further described in Qian et  
305 al. (2020), and tests of differences between means due to treatment (UV-A, UV-B or control)  
306 were performed using analysis of variance (ANOVA). Paired T-tests were used to test for  
307 changes in length of 1<sup>st</sup>-7<sup>th</sup> petioles length and parameters related to the 2<sup>nd</sup>-4<sup>th</sup> true leaves  
308 (Figs. 2-4; Tables 1 and 2). For data generated at different time periods of UV exposure,  
309 including analysis of chlorophyll fluorescence, chlorophyll content of the 1<sup>st</sup> true leaf,  
310 flavonoid content, TAC, and DNA dimer, two-way ANOVA was performed to test whether  
311 each variable was significantly affected by treatment or time of UV exposure. For data  
312 including chlorophyll fluorescence and chlorophyll content of the youngest well-developed  
313 leaf, and plant hormone concentration, T-tests were performed to analyze if the differences  
314 between UV-exposed and control samples were significant or not. Statistical analysis was  
315 performed using either SPSS 19.0 (IBM, Armonk, NY) or Wizard for Macintosh (App Store,  
316 Apple Inc., Cupertino, CA)

317  
318 To describe the relationship between the LAEFC and TUAP measurements, a simple  
319 regression model was first fitted. Thereafter additional explanatory variables giving number  
320 of days of treatment/leaf age and two dummy variables taking into account treatment (UV-A-  
321 enriched, UV-B-enriched, and control) were included, to see if they would contribute in  
322 describing the dependent variable LAEFC. The final model included the TUAP variable and  
323 the variable Days of Treatment as explanatory variables. The residuals were analyzed and the  
324 assumptions behind the model seemed to be fulfilled, and showed no signs of systematic  
325 pattern, supporting the choice of model.

326  
327 The same approach was used when TAC was the dependent variable and as explanatory  
328 variables in the full model; TUAP, Days of Treatment, two dummy variables for the  
329 treatment (UV-A, UV-B, and control). The final model included the same explanatory  
330 variables as the first model, TUAP and Days of Treatment, the other explanatory variables  
331 were not significant, thereby not contributing to the explanation of the values of TAC The  
332 analysis of the residuals did not show any indication on deviations from the model  
333 assumptions.

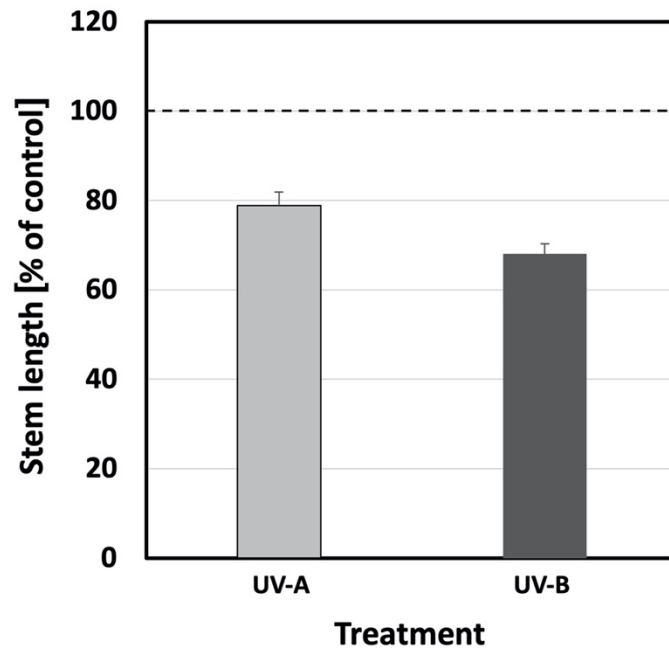

334

335 **Figure 1.** The relative change in stem length of cucumber plants grown under UV-A-enriched (light grey) or  
336 UV-B-enriched (dark grey) light, respectively, compared with the corresponding controls. The data represent  
337 mean values with  $n=18$  for all treatments and controls  $\pm$  estimated 95 % confidence interval (whiskers) of the  
338 ratio obtained from the approximated standard deviation which in turn was obtained by Taylor linearization  
339 (Taylor, 1997). The pairwise comparisons UV-A:control, UV-B:control, and UV-A:UV-B, were all significant  
340 ( $p<0.05$ ; see Table 1).

341

### 342 3. Results

343

344 A more dwarfed, UV-induced, plant architecture has been observed in many different plant  
345 species, following exposure to UV radiation. However, some of the strongest morphological  
346 responses have been observed in cucumber (e.g. see Qian *et al.*, 2020). In the present study  
347 we analyzed the induction of a more dwarfed architecture in *C. sativus* cv. Hi Jack. Two-  
348 week old cucumber plants were exposed to UV for 14 days, during which the stem length of  
349 control plants increased from, on average, 4.1 cm to 47.9 cm. Plants exposed to UV-A- or  
350 UV-B-enriched radiation remained comparatively short and reached just 79% and 68% of  
351 control stem length, respectively. (Fig. 1;  $p<0.05$ ; Table 1).

352

353 The UV-mediated decrease in elongation growth was not limited to plant height. A similar  
354 impediment of elongation could be observed for petioles. The typical petiole length for a  
355 control plant ranged between 1.5 and 11.9 cm for the 7th and the 3rd leaf, respectively.

356

357 However, petioles of plants exposed to UV-A- or UV-B-enriched radiation remained  
358 considerably shorter (Figure 2). The relative effect of UV-A-enriched radiation was more-or-  
359 less constant across the range from older to younger leaves, not exceeding more than 17%

360 inhibition. The decrease in petiole length was significant ( $p < 0.05$ ) in UV-A-exposed plants  
361 for the 1<sup>st</sup>, 2<sup>nd</sup> and 3<sup>rd</sup> petiole only (Table 1). In contrast, the effects of UV-B-enriched  
362 radiation were particularly pronounced for the youngest leaves (5<sup>th</sup>, 6<sup>th</sup>, and 7<sup>th</sup> petiole), with  
363 petiole length decreasing by more than 40% compared with control plants. This UV-B-  
364 induced decrease was significant for the 1<sup>st</sup>-7<sup>th</sup> petioles (Table 1). Also, progressive decreases  
365 in petiole length under UV-B-enriched radiation were found to be statistically significant  
366 when comparing adjoining petioles 1 through 6 (Table 2), i.e. a larger decrease the younger  
367 the tissue. However, there was no statistically significant difference in the extent of the  
368 decrease when comparing the small, developing petioles 6 and 7.

369  
370 However, petioles of plants exposed to UV-A- or UV-B-enriched radiation remained  
371 considerably shorter (Figure 2). The relative effect of UV-A-enriched radiation was more-or-  
372 less constant across the range from older to younger leaves, not exceeding more than 17%  
373 inhibition. The decrease in petiole length was significant ( $p < 0.05$ ) in UV-A-exposed plants  
374 for the 1<sup>st</sup>, 2<sup>nd</sup> and 3<sup>rd</sup> petiole only (Table 1). In contrast, the effects of UV-B-enriched  
375 radiation were particularly pronounced for the youngest leaves (5<sup>th</sup>, 6<sup>th</sup>, and 7<sup>th</sup> petiole), with  
376 petiole length decreasing by more than 40% compared with control plants. This UV-B-  
377 induced decrease was significant for the 1<sup>st</sup>-7<sup>th</sup> petioles (Table 1). Also, progressive decreases  
378 in petiole length under UV-B-enriched radiation were found to be statistically significant  
379 when comparing adjoining petioles 1 through 6 (Table 2), i.e. a larger decrease the younger  
380 the tissue. However, there was no statistically significant difference in the extent of the  
381 decrease when comparing the small, developing petioles 6 and 7.

382  
383 Leaf area was also affected by UV. Generally, only small changes in leaf area were obtained  
384 following treatment with UV-A-enriched light (Fig. 3A and B). Yet, exposure to UV-B-  
385 enriched light led to considerable decreases in leaf area. The UV-B-induced alteration was  
386 more pronounced for younger leaves, as is shown in Fig. 3A for true leaves 2, 3 and 4 (15,  
387 24, and 35% smaller leaves, respectively). For the UV-B treatment these changes were all  
388 statistically significant ( $p < 0.05$ ), whereas for UV-A only the 10% decrease in leaf area (Fig.  
389 3A) of true leaf no. 1 was statistically significant (Table 1). In addition, the progressive  
390 decrease in true leaf area under UV-B-enriched radiation was statistically significant for true  
391 leaf 2 compared with leaf 3, and leaf 3 compared with leaf 4 ( $p < 0.001$ ; Table 2), confirming a  
392 larger decrease the younger the tissue. At the whole plant level, this resulted in a statistically  
393 significant decrease in leaf area by 5% for plants exposed to UV-A-enriched light and by

394 28% for plants grown under UV-B-enriched light (Fig. 3B). In parallel, UV-B exposure  
 395 caused a statistically significant decrease in leaf dry weight for true leaves 2, 3 and 4 (Fig.  
 396 3C; Table 1), while UV-A exposure caused a small increase.

397  
 398 **Table 1.** Significant differences between means of measured variables with regards to treatment and where 'x'  
 399 denotes p<0.05. T-tests were used for total plant or leaf parameters, whereas paired t-tests were used for petiole  
 400 and true leaf parameters comparing developmental effects on same plant individuals. Petioles and leaves are  
 401 numbered in order of appearance, with higher numbers for younger structures.

| Plant part                | Parameter        | UV-A :  |                | UV-A : UV- |  | Fig. no. |
|---------------------------|------------------|---------|----------------|------------|--|----------|
|                           |                  | control | UV-B : control | B          |  |          |
| Stem                      | Length           | x       | x              | x          |  | 1        |
| 1 <sup>st</sup> petiole   | Length           | x       | x              | x          |  | 2        |
| 2 <sup>nd</sup> petiole   | Length           | x       | x              |            |  | 2        |
| 3 <sup>rd</sup> petiole   | Length           | x       | x              | x          |  | 2        |
| 4 <sup>th</sup> petiole   | Length           |         | x              | x          |  | 2        |
| 5 <sup>th</sup> petiole   | Length           |         | x              | x          |  | 2        |
| 6 <sup>th</sup> petiole   | Length           |         | x              | x          |  | 2        |
| 7 <sup>th</sup> petiole   | Length           |         | x              | x          |  | 2        |
| 2 <sup>nd</sup> true leaf | Area             | x       | x              |            |  | 3A       |
| 3 <sup>rd</sup> true leaf | Area             |         | x              | x          |  | 3A       |
| 4 <sup>th</sup> true leaf | Area             |         | x              | x          |  | 3A       |
| Total leaf                | Area             | x       | x              | x          |  | 3B       |
| 2 <sup>nd</sup> true leaf | Dry mass         |         | x              | x          |  | 3C       |
| 3 <sup>rd</sup> true leaf | Dry mass         | x       | x              | x          |  | 3C       |
| 4 <sup>th</sup> true leaf | Dry mass         | x       | x              | x          |  | 3C       |
| 2 <sup>nd</sup> true leaf | SLA              | x       | x              | x          |  | 4A       |
| 3 <sup>rd</sup> true leaf | SLA              | x       | x              | x          |  | 4A       |
| 4 <sup>th</sup> true leaf | SLA              | x       |                | x          |  | 4A       |
| Total leaf                | SLA              | x       |                | x          |  | 4B       |
| Total plant               | Dry mass         | x       | x              | x          |  | 5A       |
|                           | Shoot/root ratio | x       |                |            |  | 5B       |
|                           | LMF              | x       | x              | x          |  | 5C       |

402

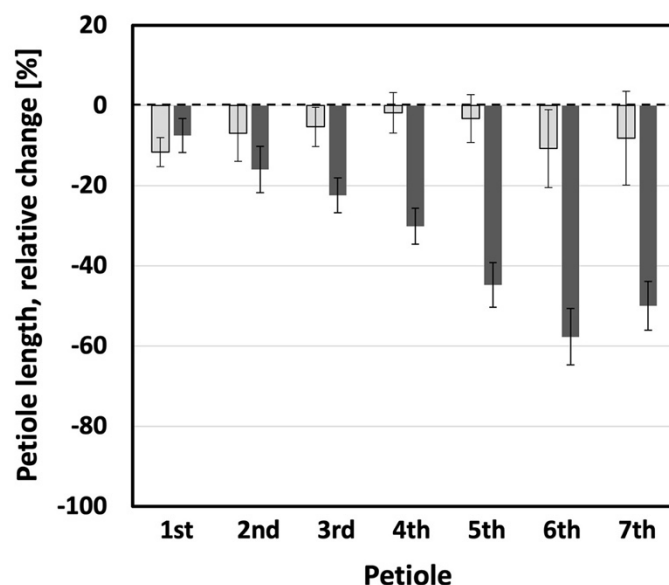

403  
404 **Figure 2.** The relative decrease of the lengths of the 1<sup>st</sup> to 7<sup>th</sup> petioles of cucumber plants when grown 14 days  
405 under UV-A-enriched (light grey) or UV-B-enriched light (dark grey), respectively, compared with the  
406 corresponding controls. The data represent mean values with n=18 for all treatments and n=36 for controls  $\pm$   
407 95% confidence interval obtained using the approximated standard deviation which was obtained by Taylor  
408 linearization (Taylor, 1997). The significant differences ( $p < 0.05$ ) of the pairwise comparisons UV-A:control,  
409 UV-B:control, and UV-A:UV-B, are shown in Table 1.

410  
411 **Table 2.** Pairwise comparisons for statistical significance (paired t-test) of petiole length and true leaf area in  
412 plants exposed to UV-B-enriched light and where \* is  $p < 0.05$ ; \*\* is  $p < 0.01$ ; \*\*\* is  $p < 0.005$ ; \*\*\*\* is  $p < 0.001$   
413 and n.s. is not statistically significant. Petioles and leaves are numbered in order of appearance, with higher  
414 numbers for younger structures.

| Treatment     | Parameter      | Plant part 1              | Plant part 2              | Level of significance | Fig. no. |
|---------------|----------------|---------------------------|---------------------------|-----------------------|----------|
| UV-B-enriched | Petiole length | 1 <sup>st</sup> petiole   | 2 <sup>nd</sup> petiole   | ***                   | 2        |
|               |                | 2 <sup>nd</sup> petiole   | 3 <sup>rd</sup> petiole   | **                    | 2        |
|               |                | 3 <sup>rd</sup> petiole   | 4 <sup>th</sup> petiole   | ****                  | 2        |
|               |                | 4 <sup>th</sup> petiole   | 5 <sup>th</sup> petiole   | ****                  | 2        |
|               |                | 5 <sup>th</sup> petiole   | 6 <sup>th</sup> petiole   | ****                  | 2        |
|               |                | 6 <sup>th</sup> petiole   | 7 <sup>th</sup> petiole   | ****                  | 2        |
| UV-B-enriched | True leaf area | 2 <sup>nd</sup> true leaf | 3 <sup>rd</sup> true leaf | ****                  | 3A       |
|               |                | 3 <sup>rd</sup> true leaf | 4 <sup>th</sup> true leaf | ****                  | 3A       |

415  
416 The observed decrease in leaf area, together with a slightly larger decrease in leaf mass in  
417 plants exposed to UV-B-enriched light (Fig. 3A vs 3C), results in a statistically significant  
418 increase in specific leaf area (SLA) in the 2<sup>nd</sup> and 3<sup>rd</sup> leaves (Fig. 4A and Table 1). The older  
419 the leaves, the larger the increase in SLA. A similar trend was also seen in the total plant  
420 SLA (Fig. 4B) which, however, was not statistically significant. In contrast, a clear and  
421 statistically significant negative effect of UV-A-enriched light on 2<sup>nd</sup>, 3<sup>rd</sup>, and 4<sup>th</sup> leaf SLA as

422 well as on total plant SLA is discernible, with total SLA decreasing by as much as 18%  
 423 compared with control leaves (Fig. 4 B and Table 1). There was a statistically significant  
 424 difference in SLA between plants exposed to UV-A- and UV-B-enriched light in all cases  
 425 (Fig. 4A and B and Table 1).  
 426

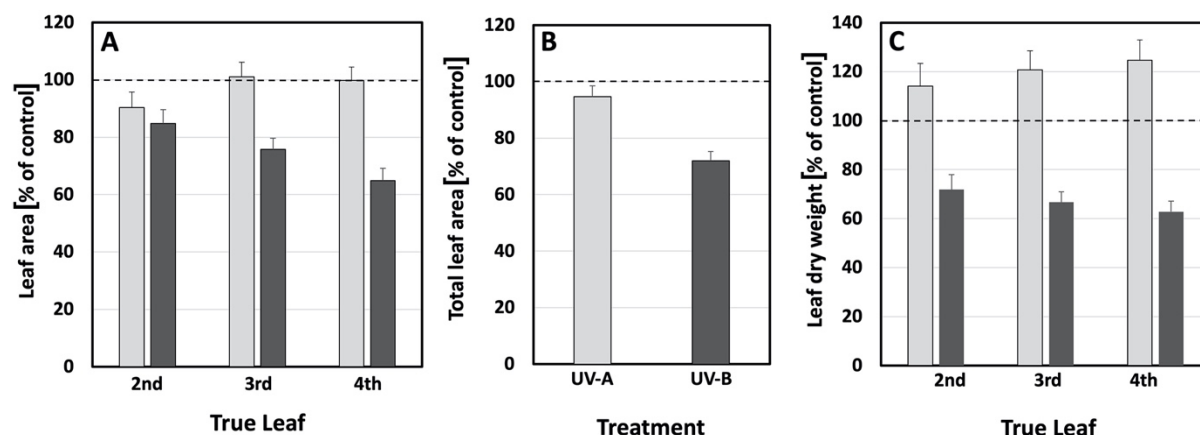

427 **Figure 3.** The relative change of (A) leaf area of true leaves 2, 3, and 4; (B) total leaf area; (C) dry weight of  
 428 true leaves 2, 3, and 4, compared with the corresponding controls when grown under UV-A- or UV-B-enriched  
 429 light, respectively. The data represent mean values with n=18 for all treatments and n=36 controls  $\pm$  the  
 430 estimated 95 % confidence interval (whiskers) of the ratio obtained using the approximated standard deviation  
 431 which was obtained by Taylor linearization (Taylor, 1997). The significant differences ( $p < 0.05$ ) of the pairwise  
 432 comparisons UV-A:control, UV-B:control, and UV-A:UV-B, are shown in Table 1.  
 433  
 434

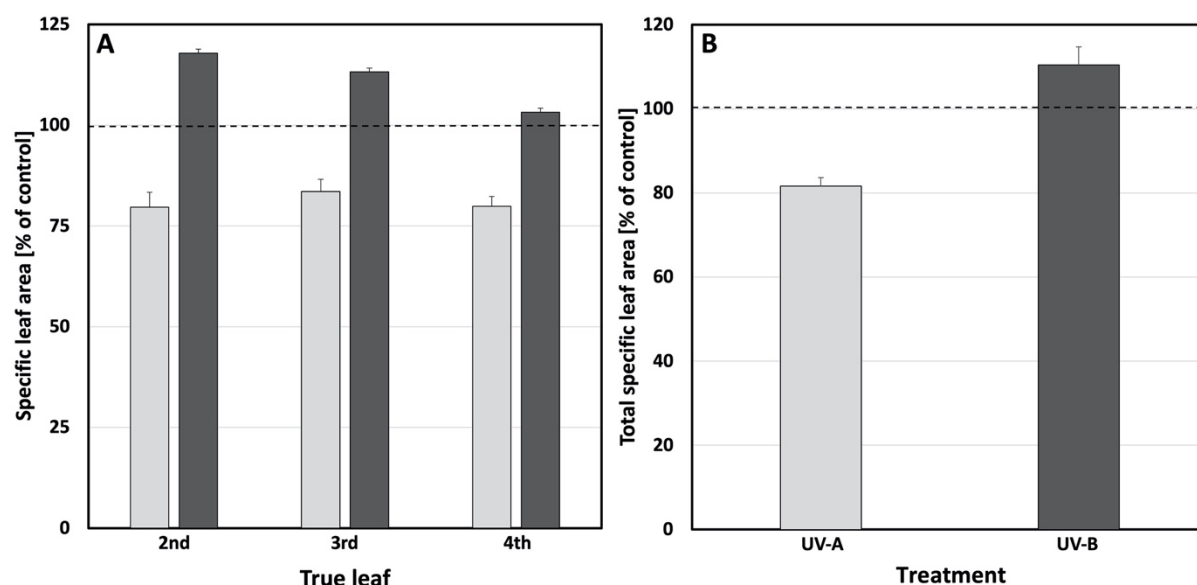

435 **Figure 4.** The relative change in (A) specific leaf area (SLA [ $\text{cm}^2 \text{mg}^{-1}$ ]) of true leaves 2, 3, and 4;  
 436 compared with the corresponding controls when grown under UV-A- enriched (light grey) or UV-B-enriched  
 437 (dark grey) light, respectively. The ratios are based on the mean values with n=18 for all treatments and n=36  
 438 controls  $\pm$  estimated 95 % confidence interval (whiskers) obtained using the approximated standard deviation  
 439 which was obtained by Taylor linearization (Taylor, 1997). The significant differences in specific leaf area  
 440 ( $p < 0.05$ ) of the pairwise comparisons UV-A:control, UV-B:control, and UV-A:UV-B, are shown in Table 1.  
 441  
 442

443 To explore whether the more compact architecture of plants exposed to UV-A- or UV-B-  
 444 enriched light was related to an overall decrease in growth, both biomass and photosynthetic

445 activity were measured. The dry weight of control plants ranged between 3.8 and 4.6 g  
446 (average 4.2 g) after 28 days of growth. Overall, UV-A-enriched radiation significantly  
447 stimulated plant biomass production by 14% relative to the control (Fig. 5A and Table 1). In  
448 contrast, UV-B-enriched radiation had a clear negative impact on biomass accumulation. The  
449 statistically significant decrease in biomass caused by UV-B was 28% (Fig. 5A and Table 1).  
450 UV-A also impacted on the shoot-to-root ratio, resulting in a 22% decrease (Fig. 5B and  
451 Table 1) due to the relatively high root biomass in plants exposed to UV-A-enriched light. No  
452 such effect was seen in plants exposed to UV-B-enriched light. A small but statistically  
453 significant increase in the leaf weight fraction, relative to the controls (Fig. 5C and Table 1),  
454 was induced by both UV-A and UV-B.  
455

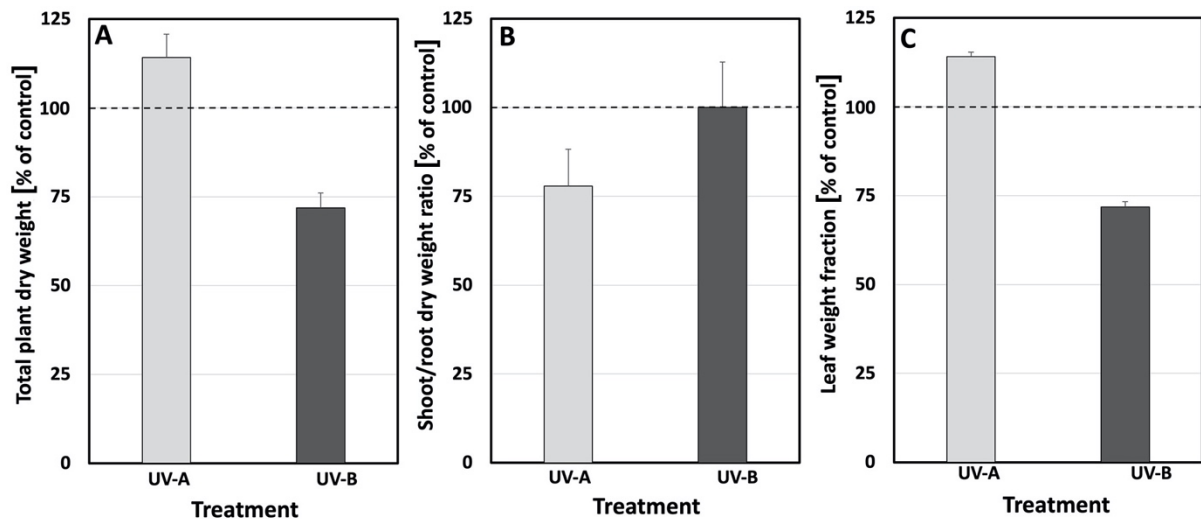

456 **Figure 5.** The relative change in (A) plant dry matter, (B) shoot/root dry matter ratio, and (C) leaf weight  
457 fraction with the corresponding controls when grown under UV-A-enriched (light grey) or UV-B-enriched (dark  
458 grey) light, respectively. The ratios are based on the mean values with n=18 for all treatments and n=36 for  
459 controls  $\pm$  estimated 95 % confidence interval (whiskers) obtained using the approximated standard deviation  
460 which was obtained by Taylor linearization (Taylor, 1997). The significant differences ( $p < 0.05$ ) of the pairwise  
461 comparisons UV-A:control, UV-B:control, and UV-A:UV-B, are shown in Table 1.  
462  
463

464 To understand the underlying cause of the observed alterations in plant morphology, it was  
465 explored whether UV-exposed plants exhibited disrupted metabolism as a response to stress.  
466 Photosynthetic activities were monitored using chlorophyll fluorometry throughout the  
467 experiment for all treatments. The initial measurement of  $F_v/F_m$  on the four measuring days  
468 did not differ between treatment nor day and was  $0.792 \pm 0.012$  (data not shown). Thus, the  
469 photosynthetic response did not change over time (data not shown) and just data from day 15,  
470 the first day after the UV enrichment, are presented (Fig. 6). The measurements were done on  
471 the youngest well-developed leaf and followed by exposure to actinic light at low ( $302 \mu\text{mol}$   
472  $\text{m}^{-2} \text{s}^{-1}$ ) and high ( $1860 \mu\text{mol} \text{m}^{-2} \text{s}^{-1}$ ) PAR. The lower PAR corresponded to a level in the



473 range that the plants experienced during most of the day in the greenhouse, while the high  
474 level corresponded to light saturation, where potential differences in light acclimation are  
475 most clearly shown. Despite the exposed position of the youngest fully developed leaf and  
476 exposure to the treatments for the entirety of its development, the operation efficiency of PSII  
477 ( $F_q'/F_m'$ ; Fig. 6A) and fraction of open PSII ( $q_L$ ; Fig. 6B) were both unaffected by UV  
478 treatments. The only treatment effect was a small but significant increase in heat dissipation  
479 through NPQ (Fig. 6C) in cucumbers grown in UV-A-enrichment. This was not a big enough  
480 increase to affect  $F_q'/F_m'$  and  $q_L$ , indicating that photosynthesis was not affected by the UV-  
481 enrichment.

482

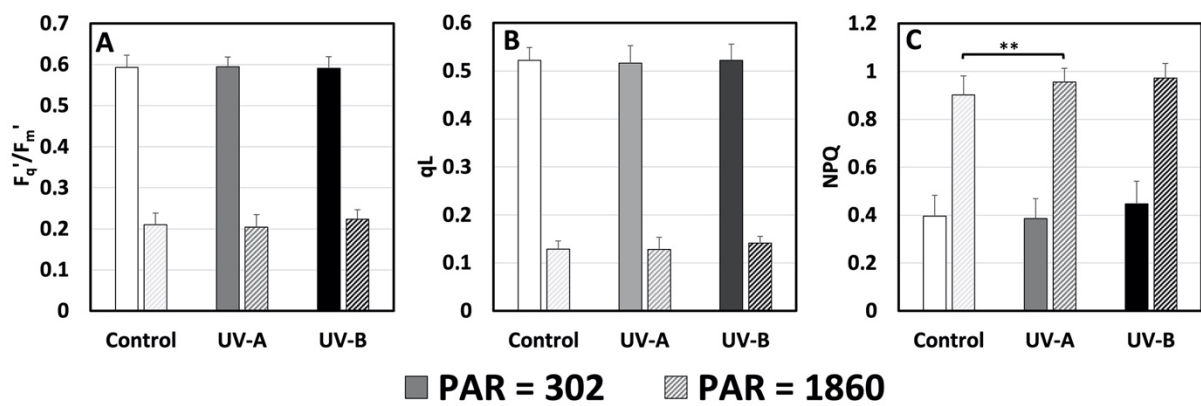

483

484 **Figure 6.** The response of (A) the operation efficiency of PSII ( $F_q'/F_m'$ ), (B) the fraction of open PSII ( $q_L$ ), and  
485 (C) heat dissipation measured as non-photochemical quenching of fluorescence (NPQ) measured on the  
486 youngest well-developed leaf under an actinic PAR of 302 or 1860  $\mu\text{mol m}^{-2} \text{s}^{-1}$  day 15 after commencement of  
487 UV exposure (last day of UV exposure day 14) to UV-deficient control (white), UV-A-enriched (grey) or UV-  
488 B-enriched (black) light. The data represent mean values  $\pm$  SD with  $n = 9$  for UV treatments and  $n = 18$  for  
489 controls. T-test was used for statistical analysis. \*\* were used to represent the significant difference for  $P \leq 0.01$ .

490

491 In parallel to measurements of the photosynthetic activity, chlorophyll content was measured  
492 using a Dualex. For the duration of the experiment, the 1<sup>st</sup> true leaf slowly accumulated more  
493 chlorophyll per unit of leaf area (Fig. 7A). Treatment with UV-A- or UV-B-enriched  
494 radiation has no impact on this process. Likewise, in the youngest well-developed leaf,  
495 measured on day 15 of UV treatment, there was no statistically significant effect of UV-A or  
496 UV-B on chlorophyll content (Fig. 7B).

497

498 A key component of plant UV protection is the accumulation of flavonols and related  
499 compounds. Here we show a complex induction curve using two independent approaches that  
500 both peaked five days after commencement of UV treatment. LAEFC measurements (using  
501 the Dualex instrument) revealed that UV-B-enriched, and to a lesser extent UV-A-enriched,  
502 radiation induced accumulation of flavonols in the 2<sup>nd</sup> true leaf (Fig. 8A). The same pattern

503 can be observed in TUAP, reflecting the total leaf content of flavonoids. Here, the absorbance  
504 at 330 nm of methanolic extracts of leaf discs from UV-B exposed plants increased  
505 substantially. To a lesser extent this was also the case for plants exposed to UV-A-enriched  
506 light (Fig. 8B).  
507

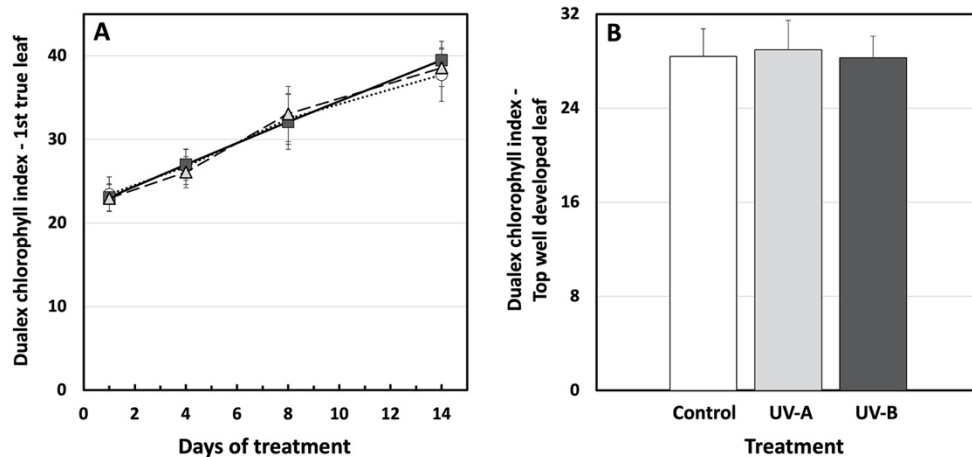

508 **Figure 7. (A)** The adaxial surface chlorophyll levels expressed as “Dualex chlorophyll index” of the 1<sup>st</sup> true leaf  
509 of UV-deficient controls (open circles), UV-A-enriched light (grey triangles) and UV-B-enriched light (closed  
510 squares) treated plants; (B) Adaxial surface chlorophyll levels of the youngest well-developed leaf measured on  
511 day 15 after commencement of treatment using UV-A-enriched (light grey) or UV-B-enriched (dark grey)  
512 growth light, compared with the corresponding UV-deficient control (white). Sampling was done as in Fig. 1.  
513 The data represent mean values  $\pm$  SD, n=9 for the UV-enriched treatments and n=18 for the control. Two-way  
514 ANOVA was used to test the effect of exposure time, and treatment on adaxial surface chlorophyll levels of the  
515 1<sup>st</sup> true leaf. T-test was used to test the significant difference of upper surface chlorophyll levels in youngest  
516 well-developed leaf between UV-treated and control samples.  
517

518  
519 To ascertain to what extent the two analytical methods describe the same physiological  
520 process within the plant leaf (i.e. that the two different pools of flavonoids measured by these  
521 techniques were directly proportional to each other), two models were adapted to describe  
522 the relationship between the methods. First, a simple linear relationship between read-outs of  
523 the two analytical flavonol assessment methods was assumed (see Supplementary Equation  
524 S1 and Supplementary Fig. S1), without taking into account the type of treatment (UV-A- or  
525 UV-B-enriched) or leaf age. The  $R^2$  of this linear fit was 0.76.

526  
527 In a second model, the dependence between the results of the LAEFC and TUAP methods  
528 was assumed to be due also to treatment (UV-A- or UV-B-enriched, or control) and leaf age:

$$529 \hat{y} = 0.42 + 0.044X - 0.0065X^3. \quad (\text{Eqn. 1})$$

530 A small influence of leaf age ( $X^3$ ) was found.  $R^2$  of this fit was 0.84, indicating that this  
531 model is better in explaining the dependence between LAEFC and TUAP. Also, the residual  
532 plots show a random pattern on both sides of 0 (Supplementary Fig. S2A and S2B), thus

533 justifying the model assumptions that leaf age is also a determinant of the relationship  
534 between LAEFC and TUAP. Furthermore, and provided that the linear relationship is valid  
535 also for  $x <$  the observed values, a zero level in the TUAP parameter (i.e. at the intercept of  
536 the axis of the LAEFC parameter) corresponded to a Dualex index of 0.42 in Eqn. 1,  
537 indicating the presence of flavonols in the epidermal cells when the flavonoid level in the  
538 bulk of the leaf is negligible.

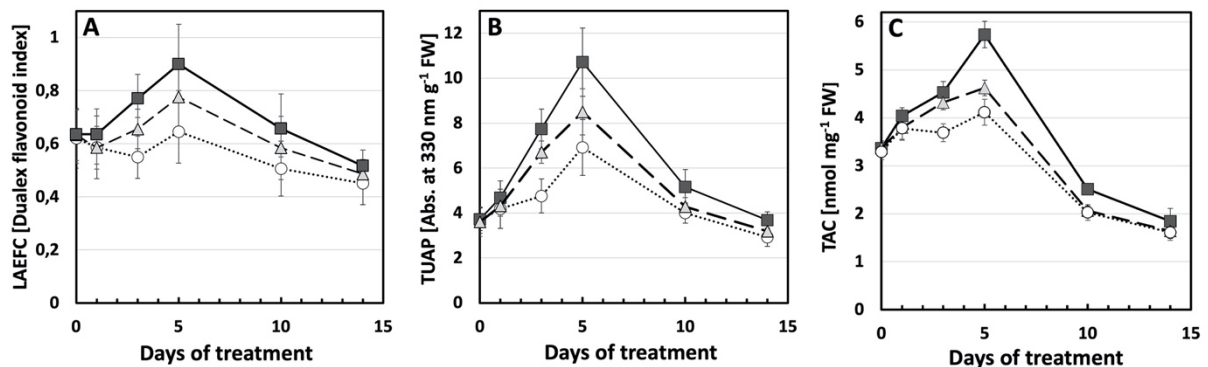

539 **Figure 8.** (A) Leaf adaxial epidermal flavonol content, LAEFC, measured with Dualex; (B) total UV-absorbing  
540 pigments, TUAP, measured spectrophotometrically at 330 nm per leaf fresh weight; (C) total antioxidant  
541 capacity, TAC, measured as nmol Trolox equivalents per mg leaf fresh weight. Measurements were performed  
542 on the 2<sup>nd</sup> true leaf of two-week old cucumber plants grown under UV-A-enriched (grey triangles) or UV-B-  
543 enriched light (closed squares), respectively, and compared with the corresponding controls (open circles). Data  
544 represent mean values  $\pm$  SD with  $n = 9$  for the UV-enriched treatments and  $n = 18$  or the control treatment.  
545

546  
547 Linked to the increase in flavonols, an increase in total antioxidant capacity (TAC) can be  
548 seen in leaves exposed to UV-B-enriched light. To a small extent, leaves exposed to UV-A-  
549 enriched light also increased their TAC (Fig. 8C). Interestingly, whereas both the LAEFC  
550 and TUAP parameters on day 14 returned to a level similar to the one before onset of UV  
551 exposure, or slightly below, the TAC parameter decreased to approximately 50% of the initial  
552 value, independently of whether the plants had experienced any of the UV exposures or were  
553 controls.

554  
555 To more accurately examine this biphasic nature of the TAC measurements, we studied the  
556 dependence between the Trolox assay and the two other methods applied in this study  
557 (LAEFC and TUAP). First, for the dependence between the TAC and the LAEFC assays, we  
558 assumed two simple linear relationships, without taking into account the type of treatment  
559 (UV-A- or UV-B-enriched), but dividing up the samples in those from younger leaves ( $\leq 5$   
560 days of exposure time, i.e.  $\leq 19$  days after sowing) and those from older leaves ( $\geq 10$  days of  
561 exposure time, i.e.  $\geq 24$  days after sowing). In this case the differences of the linear  
562 relationships between the TAC and LAEFC assays became apparent, as is shown in Fig. 9A.  
563 The model for the linear dependence with regards to young leaves was found to be:

564  $\hat{y} = 0.143 + 0.1276X,$  (Eqn. 2)

565 whereas for the linear dependence with regards to older leaves, the equation was:

566  $\hat{y} = 0.124 + 0.2068X.$  (Eqn. 3)

567

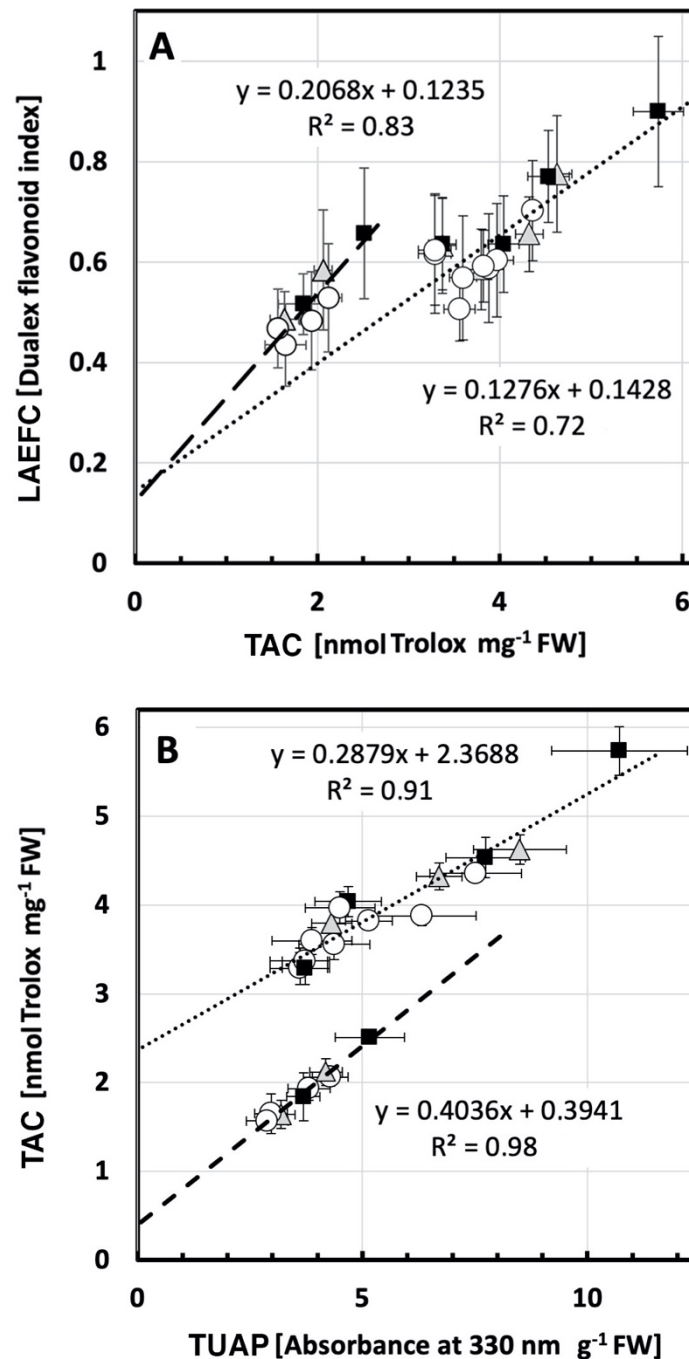

568

569 **Fig. 9. (A)** The biphasic relationship between TAC and LAEFC (assumed in Eqs. 2 and 3) in UV-deficient  
570 controls (open circles), plants grown in either UV-A-enriched light (grey triangles) or UV-B-enriched light  
571 (closed squares). The dotted line corresponds to younger leaves (Eqn. 2), whereas the dashed line corresponds to  
572 older leaves (Eqn. 3). **(B)** The biphasic relationship between TAC and TUAP (same symbols as in A), assumed  
573 in Eqs. 4 and 5. The dotted line corresponds to younger leaves (Eqn. 2), whereas the dashed line corresponds to  
574 older leaves (Eqn. 3).

575

576  $R^2$  for the fits of data points to the two assumed linear relationships was 0.72 and 0.83,  
577 respectively. The intercept at zero TAC level was similar for both linearizations with a  
578 LAEFC value of approximately 0.13 (Eqs. 2 and 3), indicating a low level of leaf epidermal  
579 flavonols that are not active as antioxidants.

580

581 We also applied a second model to describe the results of the LAEFC measurements with the  
582 TAC method as an explanatory variable and also including explanatory variables treatment  
583 (UV-A- or UV-B-enriched) and leaf age (see Supplementary material). However, in this case  
584 we did not find any statistically significant proof for the assumption that UV treatment or leaf  
585 age influences the correlation (see Supplementary Eqn. S2) and we could not conclude which  
586 of the two models that better explained the correlation between data points.

587

588 Finally, we scrutinized the linear dependence between the TUAP (Fig. 8B) and the TAC  
589 methods (Fig. 8C), using the same two models as applied above. In Fig. 9B, we again  
590 assumed two simple linear relationships, without taking into account the type of treatment  
591 (UV-A- or UV-B-enriched), but dividing up the samples in those for younger leaves ( $\leq 5$   
592 days of exposure time, i.e.  $\leq 19$  days after sowing) and those from older leaves ( $\geq 10$  days of  
593 exposure time, i.e.  $\geq 24$  days after sowing). Two linear relationships between the TAC and  
594 TUAP data were estimated and the equation with regards to younger tissue was found to be:

$$595 \hat{y} = 2.37 + 0.29X. \quad (\text{Eqn. 4})$$

596 In this case the equation explained variation in data with a factor  $R^2$  of 0.91. For older tissue  
597 the equation became:

$$598 \hat{y} = 0.39 + 0.40X. \quad (\text{Eqn. 5})$$

599  $R^2$  was even higher (0.98) for the older leaves and the difference between the intercepts at 0  
600 absorbance for TUAP differed approximately 6-fold (0.39 to 2.37). A second model, where  
601 involvement of both treatment effects (UV-A- or UV-B-enriched) and leaf age was  
602 considered, was also tested. Now, a clear effect of tissue age was seen on the dependence  
603 between TUAP and TAC (Supplementary Eqn. S3). Thus, leaf age has to be considered when  
604 comparing results of assays for leaf total flavonoids and anti-oxidative capacity.

605

606 To further understand the link between UV exposure and induced changes in plant  
607 morphology, accumulation of CPD dimers was measured in leaves of plants exposed to UV-  
608 A- or UV-B-enriched light and in control plants to see whether induced CPDs were  
609 associated with the smaller cucumber phenotype. Overall, the number of CPDs was low, and,

610 with the exception of day 14, variability was limited. There were no statistically significant  
611 effects of UV-A or UV-B on CPD accumulation (Fig. 10).

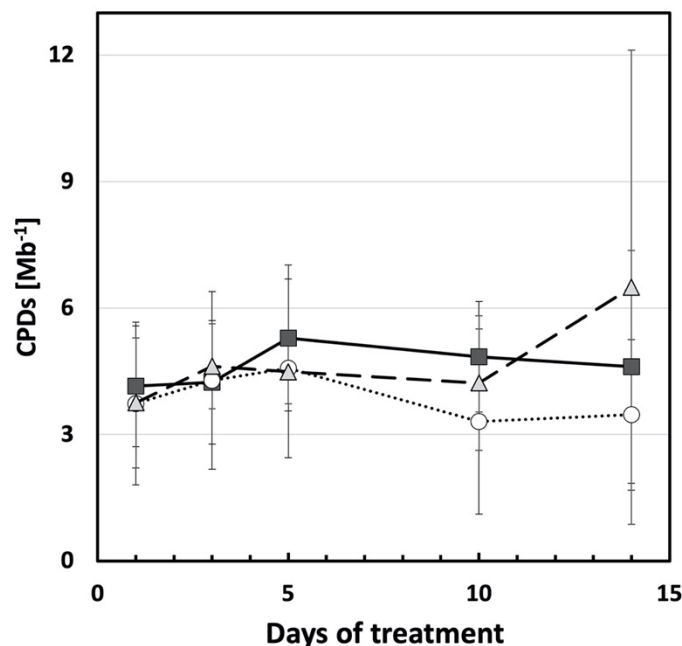

612  
613 **Figure 10.** Cyclobutane pyrimidine dimers per mega base (CPDs Mb<sup>-1</sup>) of the 2<sup>nd</sup> true leaf during the UV  
614 treatments compared with the corresponding controls (open circles) when grown under UV-A-enriched (grey  
615 triangles) or UV-B-enriched (closed squares) light, respectively. The data represent mean values  $\pm$  SD with n =  
616 9 for the UV-enriched treatments and n = 18 for the control treatment. Two-way ANOVA was used to test the  
617 effect of exposure time and treatment.

618  
619 Finally, to explore whether changes in key plant hormones are associated with observed  
620 changes in plant morphology, leaf concentrations of abscisic acid (ABA), gibberellins (GA)  
621 and the auxins indole acetic acid (IAA) and indole butyric acid (IBA), were quantified.  
622 Statistically significant decreases in ABA, IAA, and IBA were associated with leaf  
623 development (Table 3). No statistically significant effects of UV treatment were observed,  
624 although small decreases in the gibberellins GA1, GA44, GA6 and GA15 were noted in  
625 plants exposed to either UV-A or UV-B enriched radiation (Table 3).

626 **Table 3.** Main plant hormones, including abscisic acid (ABA), gibberellins (GA), and the auxins indole acetic acid (IAA) and indole butyric acid (IBA)), present in the 2<sup>nd</sup>  
627 true leaf on day 3, and 5 of UV treatments. Plant tissue from one plant in each of three boxes per treatment was pooled together with three separate experiments giving n = 3  
628 for both the UV-enriched treatments and the control treatment. The data represent mean values ± SD. For data of each plant hormone species, T-test was used to test the  
629 significant difference between each two treatments. The levels of the following hormone species were under the detection limit: GA3, GA4, GA5, GA8, GA12, GA19,  
630 GA20, IAA-OX, IAA-OH, IBA-OX, IBA-OH-C, IBA-OX-C. The levels of the following hormone species did not show any clear trend: GA7, IAA-C, IBA-C.

| Hormone species | UV-A                                            |                                                 | UV-A                                            |                                                 | UV-B                                            |                                                 | UV-B                                            |                                                 | Trend                             |
|-----------------|-------------------------------------------------|-------------------------------------------------|-------------------------------------------------|-------------------------------------------------|-------------------------------------------------|-------------------------------------------------|-------------------------------------------------|-------------------------------------------------|-----------------------------------|
|                 | 3 day control                                   | 3 day exposed                                   | 5 day control                                   | 5 day exposed                                   | 3 day control                                   | 3 day exposed                                   | 5 day control                                   | 5 day exposed                                   |                                   |
|                 | Average content ± S.D.<br>[pmol/g fresh weight] | Average content ± S.D.<br>[pmol/g fresh weight] | Average content ± S.D.<br>[pmol/g fresh weight] | Average content ± S.D.<br>[pmol/g fresh weight] | Average content ± S.D.<br>[pmol/g fresh weight] | Average content ± S.D.<br>[pmol/g fresh weight] | Average content ± S.D.<br>[pmol/g fresh weight] | Average content ± S.D.<br>[pmol/g fresh weight] |                                   |
| ABA             | 85.5 ± 12.3                                     | 96.8 ± 9.0                                      | 48.3 ± 12.0                                     | 67.7 ± 16.0                                     | 71.9 ± 14.1                                     | 77.7 ± 3.4                                      | 54.9 ± 2.6                                      | 52.4 ± 13.4                                     | Significant age-induced decrease  |
| GA1             | 17.0 ± 7.4                                      | 9.7 ± 0.8                                       | 13.3 ± 1.2                                      | 11.7 ± 3.3                                      | 11.1 ± 2.6                                      | 10.0 ± 2.8                                      | 16.6 ± 5.7                                      | 11.7 ± 1.5                                      | Trend of UVA/UVB induced decrease |
| GA44            | 2268 ± 1447                                     | 1123 ± 342                                      | 2104 ± 1214                                     | 1315 ± 186                                      | 1485 ± 312                                      | 1099 ± 298                                      | 4850 ± 3668                                     | 1184 ± 155                                      | Trend of UVA/UVB induced decrease |
| GA9             | 468 ± 288                                       | 177 ± 55                                        | 424 ± 62                                        | 360 ± 120                                       | 268 ± 131                                       | 184 ± 89                                        | 832 ± 626                                       | 237 ± 57                                        | Trend of UVA/UVB induced decrease |
| GA15            | 2367 ± 1403                                     | 839 ± 475                                       | 1825 ± 1112                                     | 1281 ± 713                                      | 1579 ± 944                                      | 1035 ± 617                                      | 4925 ± 3776                                     | 1109 ± 427                                      | Trend of UVA/UVB induced decrease |
| IAA             | 84.4 ± 33.4                                     | 95.4 ± 3.0                                      | 60.2 ± 5.0                                      | 67.3 ± 6.6                                      | 88.4 ± 20.1                                     | 89.9 ± 3.7                                      | 67.2 ± 6.2                                      | 70.1 ± 7.5                                      | Significant age-induced decrease  |
| IBA             | 1362 ± 387                                      | 1242 ± 67                                       | 361 ± 139                                       | 522 ± 125                                       | 1197 ± 142                                      | 865 ± 368                                       | 531 ± 100                                       | 489 ± 193                                       | Significant age-induced decrease  |
| IBA-OH          | 1141 ± 357                                      | 934 ± 53                                        | 278 ± 108                                       | 427 ± 126                                       | 971 ± 133                                       | 696 ± 309                                       | 450 ± 90                                        | 422 ± 188                                       | Significant age-induced decrease  |

631

632

## 633 4. Discussion

634

### 635 4.1. *Cucumber displays a strong morphological response when exposed to supplemental UV*

636

637 Here we explored the regulation of plant morphology by white light enriched with either UV-  
638 A or UV-B. The data show that enrichment of the spectrum with either UV wavelength  
639 results in a stocky cucumber phenotype. These data are in agreement with previous studies  
640 that show that cucumber is particularly responsive to UV-exposure (Krizek et al., 1978;  
641 Murali & Teramura, 1986; Ballaré et al., 1991; Adamse & Britz, 1992; Adamse, Britz &  
642 Caldwell, 1994; Krizek, Mirecki & Kramer, 1994; Takeuchi, Kubo, Kasahara & Sasaki,  
643 1996; Krizek, Mirecki & Britz, 1997; Fukuda, Satoh, Kasahara, Matsuyama & Takeuchi,  
644 2008; Shinkle, Edwards, Koenig, Shaltz & Barnes, 2010; Yamasaki, Shimada, Kuwano,  
645 Kawano & Noguchi, 2010; Yamasaki, Shigeto, Ashihara & Noguchi 2014; Qian et al., 2019,  
646 2020). Therefore, we consider cucumber a promising model species for the study of the  
647 stocky UV phenotype, a role that will be facilitated by the large leaf surface area which  
648 enables measurement of potential hormone gradients within organs. The data presented in  
649 this study show that especially elongation is affected by UV-exposure, with noted decreases  
650 in stem and petiole length, as well as in leaf area. These effects were larger in plants that had  
651 been grown in the UV-B-enriched light environment than in the UV-A-enriched ditto (Figs. 1,  
652 2, 3A and 3B). Interestingly, whereas the petiole lengths and leaf area in plants treated with  
653 UV-A-enriched light were approximately the same independently of tissue age, there was a  
654 progressively larger decrease in these parameters the younger the tissue in the presence of  
655 UV-B radiation (Figs. 2 and 3A; Table 2). Finally, in plants grown under the UV-A-enriched  
656 light regimen, a significant reallocation of photosynthate from shoot to root by more than  
657 20% was seen (Fig. 5B). The differences between the effects of UV-A- and UV-B-enriched  
658 light on cucumber morphology indicate that there may be different developmental regulatory  
659 mechanisms involved in the two cases.

660

661 The overall results are thus consistent with earlier descriptions of the UV-phenotype, which  
662 referred to a more “stocky” architecture (Barnes, Ballaré & Caldwell, 1996; Jansen et al.,  
663 1998; Robson et al., 2015b). Other aspects of the UV-phenotype, such as leaf thickening are  
664 also apparent in the current study, and a decrease in SLA was noted in plants exposed to UV-  
665 A enriched radiation. A similar UV induced stocky phenotype has been observed in a  
666 substantial number of plant species (Robson et al., 2015b). Yet, this phenotype remains an  
667 enigma, in that major questions remain to be answered with respect to the wavelength



668 specificity of its induction, the underlying mechanism of the response, and the functional  
669 importance of the induced architectural response for the plant.

670

#### 671 *4.2. The stocky UV phenotype is not associated with plant stress*

672

673 Several hypotheses have, over the years, been proposed to explain the mechanism underlying  
674 UV-induced changes in plant morphology (Robson et al., 2015b). High UV intensities can  
675 drive the development of stress induced morphogenic responses (SIMR) as first proposed by  
676 Potters, Pasternak, Guisez, Palme & Jansen (2007). These responses are associated with the  
677 disruption of cellular metabolism (distress), resulting in a localized cessation of growth. The  
678 SIMR phenotype is characterised by decreased elongation growth, which can result in a more  
679 stocky phenotype, as described in the current study. However, in the current study there is no  
680 evidence for disruptive stress. There was a small increase in NPQ in plants grown under UV-  
681 A-enriched light but no change was found in neither maximum photochemical efficiency,  
682 redox state of PSII nor the operation efficiency of PSII in any of the UV treatments measured  
683 using chlorophyll *a* fluorometry, nor in total chlorophyll content. Furthermore, there is no  
684 evidence for an increase in accumulation of damaged DNA, i.e. CPD dimers. DNA damage  
685 may potentially result in a stocky phenotype as UV-induced dimerization of DNA can impair  
686 DNA replication, and hence impede cell cycle progression, particularly by slowing the G1-to-  
687 S phase (Jiang, Wang & Björn, 2011). Indeed, several earlier reports refer to UV-mediated  
688 impairment of cell division (Dickson & Caldwell 1978; Wargent, Gegas, Jenkins, Doonan &  
689 Paul, 2009). Others (Lake, Field, Davey, Berrling & Lomax, 2009) refer to larger cells in UV  
690 exposed plants which can be explained by endoreduplication, resulting in fewer, but bigger  
691 cells (Radziejwoski et al., 2011). Plants showing symptoms of UV stress would often have  
692 between 50 and 800 CPDs/Mb (Kang et al., 1998; Kalbin et al., 2001; Pescheck, Lohbeck,  
693 Roleda & Bilger, 2014). Yet, in the current study levels of CPDs/Mb were one- to two-orders  
694 of magnitude less, indicating efficient repair of damaged DNA. Therefore, the observed  
695 stocky phenotype is not associated with accumulated DNA damage. The data on the ABA  
696 content also are consistent with non-stress conditions. Furthermore, the data show increases  
697 in total antioxidant activity (TAC) and flavonol concentrations in leaf adaxial epidermis  
698 (LAEFC) and the entire leaf (TUAP). Taken together, these data reveal successful UV  
699 acclimation. Thus, healthy plants display the stocky UV-phenotype, implying that the strong  
700 morphological response observed in UV-exposed cucumber seedlings is a regulatory

701 adjustment that is part of the UV acclimation processes involving UV-A and/or UV-B  
702 photoreceptors.

703

#### 704 *4.3. UV acclimation is accompanied by a decrease in biomass accumulation*

705

706 Notwithstanding the apparent lack of plant stress under either UV-A or UV-B enriched light,  
707 a substantial decrease in produced total biomass was noted for plants exposed to UV-B  
708 enriched light. We have interpreted this decrease in biomass production as a secondary  
709 consequence of UV-acclimation. UV-B exposed plants with shorter stems (including shorter  
710 internodes) and shorter petioles, will condense the same number of leaves in a smaller area,  
711 hence increasing the likelihood of self-shading which, in turn, may decrease overall PAR  
712 capture, and hence photosynthetic productivity (Barnes et al., 1996). Consistently, UV-A had  
713 considerably smaller impacts on both stem and petiole length, and this was associated with a  
714 lack of impact on biomass production. UV-B-induced decreases in leaf area will further  
715 hamper PAR capture, an effect that is much smaller in plants raised under UV-A enriched  
716 light. These UV-B-mediated decreases in light capture, may also be accompanied by the  
717 often-reported UV-B-induced stomatal closure (He et al., 2013; Martínez-Lüscher et al.,  
718 2013; Tossi, Lamattina, Jenkins & Cassia, 2014), which would similarly decrease  
719 photosynthesis *in situ*, and potentially decrease biomass production. As a besides, the  
720 measured UV-A-induced decrease in SLA, may potentially improve the water use efficiency  
721 of plants (Liu & Stützel, 2004), and although water use efficiency has not been measured in  
722 this study, several reports have reported UV-induced co-tolerance with drought (Barnes et al.,  
723 2019).

724

#### 725 *4.4. Regulatory mechanism(s) underlying the stocky UV-induced phenotype*

726

727 Since the data in this study do not support an association between the stocky UV phenotype  
728 and plant stress, one or more different specific regulatory response should be considered, as  
729 argued above, dependent on what part of the UV spectrum is supplementing the PAR. The  
730 UV-B photoreceptor UVR8 was discovered in Arabidopsis mutants that did not show UV-B-  
731 induced dwarfing of hypocotyls (Hayes, Velanis, Jenkins & Franklin, 2014). Thus, UVR8 has  
732 been strongly associated with control of plant architecture. It should also be noted that, in a  
733 recent study by Rai et al. (2020), there was a marked difference in regulation of gene  
734 expression between a UVR8-dominated effect at wavelengths below 335-350 nm and a  
735 cryptochrome-dominated regulatory mechanism at UV wavelengths above 350 nm.

736 Notwithstanding, the UVR8- and CRY-regulatory mechanisms were interdependently  
737 influenced by each other.

738  
739 Thus, the mechanism underlying the UV-B induced stocky phenotype may relate to  
740 interactions with various cellular signalling pathways, including the phytochrome and  
741 cryptochrome pathways. In UV-exposed plants, UVR8 monomers bind COP1, and the  
742 resulting UVR8-COP1 complexes enter the nucleus and promote UV-B signalling which  
743 inhibits auxin biosynthesis, signalling as well as hypocotyl elongation (Hectors, van Oevelen,  
744 Guisez, Prinsen & Jansen, 2012). Parallel increases in the expression of the HY5/HYH  
745 transcription factor may enhance transcription of polar auxin transport proteins PIN1 and  
746 PIN3, as well as several regulators of auxin signalling (Vanhaelewyn, Prinsen, van der  
747 Straeten & Vandenbussche, 2016). Furthermore, sequestration of COP1 by UVR8  
748 destabilises PIF5, further interfering with auxin biosynthesis and signalling (Hayes et al.,  
749 2014; Vanhaelewyn et al., 2016). Yet, few studies have been able to demonstrate UV induced  
750 changes in auxin levels. Hectors et al. (2012) reported (non-significant) UV-B induced  
751 decreases in auxin levels in Arabidopsis leaves, as well as altered UV-B responses in auxin  
752 influx and biosynthesis mutants (Hectors et al., 2012). The current study does not present  
753 evidence for significant changes in auxin concentrations either, despite strong morphological  
754 responses, but a non-significant trend of decreasing GA concentrations is observed in both  
755 UV-A and UV-B exposed plants. UVR8 binding to COP1 can, via upregulation of  
756 transcription of HY5 and HYH, result in an increase in GA2ox1 levels, reducing GA  
757 concentrations (Hayes et al., 2014; Vanhaelewyn et al., 2016). The current study shows a  
758 trend of decreasing concentrations of GA1, GA44, GA9 and GA15, in both UV-A and UV-B  
759 exposed plants. The data in the current paper are not conclusive with respect to a role for  
760 UVR8, auxin or gibberellic acid in mediating plant UV-responses. In fact, it is debatable  
761 whether the observed dwarfing response can simply be explained as UVR8-mediated, given  
762 that responses are induced by both UV-B and UV-A radiation, albeit with partly different  
763 outcomes (progressive decreases in petiole lengths and leaf area in plants grown in UV-B-  
764 enriched light; alteration in carbon allocation from shoots toward roots in UV-A-enriched  
765 light). Therefore, although the UVR8 action spectrum remains to be fully characterised in  
766 detail, particularly with respect to potential interactive responses to UV-A wavelengths,  
767 recent evidence suggests antagonistic effects whereby responsivity to UV-B is modulated by  
768 UV-A wavelengths and *vice versa* (Morales et al., 2013; Rai et al., 2020). Thus, although a  
769 UVR8-mediated mechanism appears to be the most likely candidate to explain observed

770 decreases in both organ elongation and GA concentration in UV-B-exposed plants, major  
771 questions remain to be addressed concerning the regulation of the stocky phenotype under  
772 natural, solar light conditions where there is considerable scope for interactions between  
773 multiple wavelength bands, photoreceptors, and signalling pathways. In fact, brassinosteroids  
774 may also play a role in UV-regulation of gene expression (Sävenstrand, Brosché & Strid,  
775 2004) and development (Liang et al., 2018), a role which was further strengthened by the  
776 discovery of interaction of UVR8 with molecular regulators of brassinosteroids.

777

#### 778 *4.5. Relationships between flavonoid content and antioxidant capacity*

779

780 Protection against UV was measured in three different ways reflecting the notion that UV-B-  
781 induced flavonoidal compounds have both an antioxidative effect and a function as UV-  
782 absorbing compounds (Agati, Azzarello, Pollastri, & Tattini, 2012; Hideg & Strid, 2017). For  
783 estimation of leaf adaxial epidermal flavonol content (LAEFC), the Dualex method was used,  
784 for TUAP acidic methanol extraction and spectrophotometric detection at 330 nm was  
785 employed, and total anti-oxidative activity (TAC) was assayed using the Trolox method.  
786 Comparisons between LAEFC and TUAP measurements have been made previously  
787 (Barthod, Cerovic & Epron, 2007), and in line with published results the intercept of the plot  
788 of LAEFC versus TUAP measurements (Supplementary Fig. S1) is inferring higher flavonol  
789 content in the epidermal cell layers compared with the average in the total foliar biomass.

790

791 The data of this paper show an increased flavonoid level in leaves for up to five days after all  
792 three treatments (no UV control, UV-A-, or UV-B-enriched light). Thereafter the flavonoid  
793 content declined (Figs 8 A and B). The dependence of the flavonoidal levels (LAEFC and  
794 TUAP), with a peak at day 5 is likely to be due to leaf developmental processes. TAC also  
795 peaked on day 5 (Fig. 8C). That the peaks in all three parameters at day 5 could be related to  
796 particular weather conditions seems highly unlikely given that all experiments were  
797 independently replicated three times during different weeks between February and June. For  
798 TUAP, readings after 14 days of UV exposure were similar to those measured at the onset of  
799 the experiment (day 0). For the LAEFC, the readout on day 14 returned to levels slightly  
800 lower than at the outset, whereas for TAC the antioxidant capacity decreased between day 0  
801 and day 14 by about 50%, independently of whether the plants had experienced any UV  
802 exposures or were controls. Thus, as these trends were observed in both control and in UV-  
803 treated plants, a developmental process would be the likely cause. To improve understanding

804 of developmental processes as well as the relationships between the three different  
805 parameters, further regression analyses were performed.

806  
807 The shape of the TAC curve of antioxidant capacity as compared LAEFC or TUAP results  
808 indicates that the TAC parameter reflects two different physiological means of antioxidative  
809 activity, one being flavonoids and the second being another type of ROS scavenging of  
810 enzymatic or non-enzymatic nature, and which shows an age-dependent decrease by half  
811 through days 10 to 14. When estimating the linear dependence of the TAC and LAEFC  
812 experiments, we found that the intercept at a zero TAC level was similar for the two leaf-age-  
813 dependent linearizations used (Eqs. 2 and 3), with a LAEFC flavonol index of approximately  
814 0.13 (Fig. 9A), which indicates the presence of some flavonoidal compounds that lack  
815 antioxidant capacity, e.g. monohydroxylated species (Tattini et al., 2012). Differences in the  
816 antioxidant capacity of different flavonol species have been extensively demonstrated  
817 (Csepregi, Neugart, Schreiner & Hideg, 2016). For example, some flavones, such as  
818 apigenin, have particularly low ferric ion reducing antioxidant power (Csepregi et al., 2016).  
819 Also, it should be considered that Trolox may not be a perfect proxy for antioxidant activity  
820 in general (Csepregi et al., 2016).

821  
822 The difference in the slope of the two linear relationships in Supplementary Fig. 9A and the  
823 different shapes of the curves in Fig. 8A and 8B indicate that, as the leaf tissue aged, the pool  
824 of leaf epidermal flavonols had lost its anti-oxidative capacity, either by accumulation of  
825 more oxidized forms of this type of compounds, because of increased O-glycosylation, or due  
826 to another yet to be identified mechanism. The OH group on the 3-position on the A-ring of  
827 the flavonoid backbone is commonly glycosylated, which decreases antioxidant activity.  
828 Developmental changes in flavonol profile have also previously been shown in for instance  
829 *Sinapis alba* (Reifenrath & Müller, 2007) and *Vitis vinifera* (Bouderias, Tesztrak, Jakab, &  
830 Körösi, 2020). Also, a study by Morgenstern, Ekholm, Scheewe & Rumpunen (2014) shows  
831 that the ratio of quercetin to kaempferol in buckthorn shows a strong developmental trend,  
832 rising from just over 100 at the beginning of the season, to over 400 by mid-summer, and this  
833 effect is paralleled by a drop in gallic acid and rutin levels (Morgenstern, et al. 2014). Given  
834 the different antioxidant activities of different flavonols, this may underpin a change in  
835 antioxidant capacity.

836  
837 In our study, the loss of anti-oxidative defense (i.e. TAC) was independent of whether the  
838 plants had been kept under control conditions or under supplementary UV-A- or UV-B-

839 enriched light. Thus, this seems to be a true effect of leaf age. In old leaves, flavonoids  
840 constitute the bulk of the antioxidant capacity (intercept close to 0 in Supplementary Fig.  
841 9B), whereas in younger tissue half of the oxidant capacity (comparison of the curves in Figs  
842 8B and 8C and considering the intercept at 2.37 in Supplementary Fig. 9B) is contributed by  
843 antioxidative systems other than flavonoids, be it enzymatic or non-enzymatic, that do not  
844 absorb light at 330 nm in methanol under acidic conditions. Leaf age-dependent changes in  
845 TAC have previously been shown in greenhouse-grown grapevine leaves (Majer & Hideg,  
846 2012), using a several-fold higher biologically effective UV-B dose than we did. Four days of  
847 exposure led to a large increase in TAC in young leaves, similarly to what we found in  
848 cucumber. However, in old leaves, 4 days of UV exposure led to decreased TAC. Clearly,  
849 there are strong interactions between UV acclimation and developmental processes that  
850 govern as disparate physiological parameters in plants as stem and petiole stretching, leaf  
851 expansion, flavonoid content and total antioxidant capacity.

852

#### 853 *4.6. Conclusion*

854

855 In this paper we show that cucumber grown in UV-A- or UV-B-enriched light led to a  
856 stockier phenotype compared to on-UV-irradiated control plants. In plants grown in UV-A-  
857 enriched light, the decreases in stem and petiole lengths were similar independently of tissue  
858 age whereas in plants grown in UV-B-enriched light stems and petioles were progressively  
859 shorter the younger the tissue. In addition, plants grown under UV-A-enriched light  
860 significantly reallocated photosynthate from shoot to root, had thicker leaves and decreased  
861 specific leaf area. This infers different morphological plant regulatory mechanisms under  
862 UV-A and UV-B radiation, especially since there was no evidence of stress in any of the UV-  
863 exposed plants, as judged by the absence of effects on photosynthetic parameters,  
864 cyclobutane pyrimidine dimer levels, or ABA content. The total leaf antioxidant activity and  
865 UV-dependent accumulation patterns of flavonoidal compounds and leaf-age-dependent  
866 variation in these parameters also indicated successful acclimation of the plants to the two  
867 UV light regimens. Therefore, we conclude that the stocky UV phenotype developed in  
868 healthy plants, which in turn implies a strong regulatory adjustment and morphological  
869 response as part of a successful UV acclimation processes involving UV-A and/or UV-B  
870 photoreceptors.

871

#### 872 **Acknowledgements**

873  
874 This research was supported by grants to Å.S. from the Knowledge Foundation (kks.se;  
875 contract no. 20130164), and the Swedish Research Council Formas (formas.se/en; Contract  
876 no. 942-2015-516). The Örebro University's Faculty for Business, Science and Technology  
877 also supported the research. M.A.K.J acknowledges support by Science Foundation Ireland  
878 (S16/IA/4418). E.P acknowledges support by the Flemish Science Foundation (FWO, grant  
879 G000515N). M.Q. was sponsored by the China Scholarship Council (CSC no.  
880 201406320076).

881  
882 **Conflicts of interest**

883  
884 The authors declare no conflicts of interest

885  
886 **Author contribution**

887  
888 Åke Strid, Marcel Jansen, Eva Rosenqvist, Minjie Qian and Irina Kalbina planned the research.  
889 Minjie Qian, Åke Strid, Marcel Jansen, Eva Rosenqvist, Els Prinsen, and Frauke Pescheck  
890 designed experiments. Minjie Qian, Els Prinsen, Frauke Pescheck and Irina Kalbina performed  
891 experiments. Minjie Qian, Els Prinsen, Åke Strid, Frauke Pescheck, Ann-Marie Flygare, Eva  
892 Rosenqvist and Marcel Jansen analyzed data. Åke Strid and Marcel Jansen wrote the paper  
893 with contributions from Minjie Qian, Eva Rosenqvist, Ann-Marie Flygare, Els Prinsen and  
894 Frauke Pescheck. All authors commented and approved the manuscript.

895  
896 **ORCID**

897  
898 Eva Rosenqvist: <https://orcid.org/0000-0001-9288-6248>  
899 Els Prinsen: <https://orcid.org/0000-0003-4320-1585>  
900 Frauke Pescheck: <https://orcid.org/0000-0002-5642-158X>  
901 Irina Kalbina: <https://orcid.org/0000-0003-0018-8333>  
902 Marcel A.K. Jansen: <https://orcid.org/0000-0003-2014-5859>  
903 Åke Strid: <https://orcid.org/0000-0003-3315-8835>

904

905 **References**

- 906  
907 Adamse, P., & Britz, S.J. (1992) Amelioration of UV-B damage under high irradiance. I.  
908 Role of photosynthesis. *Photochemistry and Photobiology*, *56*, 645–650.
- 909 Adamse, P., Britz, S.J., & Caldwell, C.R. (1994) Amelioration of UV-B damage under high  
910 irradiance. II. Role of blue-light photoreceptors. *Photochemistry and Photobiology*, *60*,  
911 110–115.
- 912 Agati, G., Azzarello, E., Pollastri, S., & Tattini, M. (2012). Flavonoids as antioxidants in  
913 plants: Location and functional significance. *Plant Science*, *196*, 67-76.
- 914 Ballaré, C. L., Barnes, P.W., & Kendrick, R.E. (1991) Photomorphogenic effects of UV-B  
915 radiation on hypocotyl elongation in wild type and stable-phytochrome-deficient mutant  
916 seedlings of cucumber. *Physiologia Plantarum* *83*, 652-658.
- 917 Barnes, P.W., Ballaré, C.L., & Caldwell, M.M. (1996) Photomorphogenic effects of UV-B  
918 radiation on plants: consequences for light competition. *Journal of Plant Physiology* *148*,  
919 15-20.
- 920 Barnes, P.W., Williamson, C.E., Lucas, R.M., Robinson, S.A., Madronich, S., Paul, N.D.,  
921 Bornman, J.F., Bais, A.F., Sulzberger, B., Wilson, S.R., & Andradý, A.L. (2019) Ozone  
922 depletion, ultraviolet radiation, climate change and prospects for a sustainable future.  
923 *Nature Sustainability*, *2*, 569-579.
- 924 Barthod, S., Cerovic, Z., & Epron, D. (2007) Can dual chlorophyll fluorescence excitation be  
925 used to assess the variation in the content of UV-absorbing phenolic compounds in  
926 leaves of temperate tree species along a light gradient? *Journal of Experimental Botany*  
927 *58*, 1753-1760.
- 928 Bornman, J.F., Barnes, P.W., Robson, T.M., Robinson, S.A., Jansen, M.A.K., Ballaré, C.L.,  
929 & Flint, S.D. (2019) Linkages between stratospheric ozone, UV radiation and climate  
930 change and their implications for terrestrial ecosystems. *Photochemical and*  
931 *Photobiological Sciences*, *18*, 681-716.
- 932 Boudérias, S., Teszlák, P., Jakab, G., & Kőrösi, L. (2020) Age-and season-dependent pattern  
933 of flavonol glycosides in Cabernet Sauvignon grapevine leaves. *Scientific reports*, *10*,  
934 14241.
- 935 Csepregi, K., Neugart, S., Schreiner, M., & Hideg, É. (2016) Comparative evaluation of total  
936 antioxidant capacities of plant polyphenols. *Molecules* *21*, 208.



- 937 Dickson J.G., & Caldwell M. (1978) Leaf development of *Rumex patientia* L.  
938 (*Polygonaceae*) exposed to UV irradiation (280-320 nm). *American Journal of Botany*,  
939 65, 857-863.
- 940 Fukuda, S., Satoh, A., Kasahara, H., Matsuyama, H., & Takeuchi, Y. (2008) Effects of  
941 ultraviolet-B irradiation on the cuticular wax of cucumber (*Cucumis sativus*) cotyledons.  
942 *Journal of Plant Research*, 121, 179–189.
- 943 Hayes, S., Velanis, C.N., Jenkins, G.I., & Franklin, K.A. (2014) UV-B detected by the UVR8  
944 photoreceptor antagonizes auxin signaling and plant shade avoidance. *Proceedings of the*  
945 *National Academy of Science USA*, 111, 11894-11899.
- 946 He, J.-M., Ma, X.-G., Zhang, Y., Sun, T.-F., Xu, F.-F., Chen, Y.-P., Liu, X., & Ming Yue  
947 (2013) Role and interrelationship of Gα protein, hydrogen peroxide, and nitric oxide in  
948 ultraviolet-B-induced stomatal closure in Arabidopsis leaves. *Plant Physiology* 161,  
949 1570–1583.
- 950 Hectors, K., van Oevelen, S., Guisez, Y., Prinsen, E., & Jansen, M.A.K. (2012) The  
951 phytohormone auxin is a component of the regulatory system that controls UV-mediated  
952 accumulation of flavonoids and UV-induced morphogenesis. *Physiologia plantarum*,  
953 145, 594-603.
- 954 Hideg, É., Jansen, M.A.K., & Strid, Å. (2013) UV-B exposure, ROS and stress; inseparable  
955 companions or loosely linked associates? *Trends in Plant Science*, 18, 107-115.
- 956 Hideg, É., & Strid, Å. (2017) The effects of UV-B on the biochemistry and metabolism in  
957 plants. In *UV-B Radiation and Plant Life: Molecular Biology to Ecology*, (ed B. R.  
958 Jordan), pp. 90-110. CABI press, Oxford, UK.
- 959 Jansen, M.A.K., Bilger, W., Hideg, É., Strid, Å., UV4Plants Workshop Participants, &  
960 Urban, O. (2019) Interactive effects of UV-B radiation in a complex environment. *Plant*  
961 *Physiology and Biochemistry*, 134, 1-8.
- 962 Jansen, M.A.K., & Bornman, J.F. (2012) UV-B radiation: from generic stressor to specific  
963 regulator. *Physiologia Plantarum*, 145, 501-504.
- 964 Jansen, M.A.K., Gaba, V., & Greenberg, B.M. (1998) Higher plants and UV-B radiation:  
965 balancing damage, repair and acclimation. *Trends in Plant Science*, 3, 131-135.
- 966 Jiang, L., Wang, Y., Björn, L.O. & Li, S. (2011) UV-B-induced DNA damage mediates  
967 expression changes of cell cycle regulatory genes in Arabidopsis root tips. *Planta*, 233,  
968 831-841.

- 969 Jordan, B.R., Strid, Å., & Wargent, J.J. (2016) What role does UV-B play in determining  
970 photosynthesis? In Handbook of Photosynthesis, 3rd edition. (ed Md Pessaraki), pp.  
971 275-286. CRC Press Boca Raton, FL.
- 972 Kalbin, G., Hidema, J., Brosché, M., Kumagai, T., Bornman, J.F., & Strid Å. (2001) UV-B-  
973 induced DNA damage and expression of defence genes under UV-B stress: tissue-  
974 specific molecular marker analysis in leaves. *Plant Cell and Environment*, 24, 983-990.
- 975 Kang H.-S., Hidema J., & Kumagai T. (1998) Effects of light environment during culture on  
976 UV-induced cyclobutyl pyrimidine dimers and their photorepair in rice (*Oryza sativa* L.).  
977 *Photochemistry and Photobiology*, 68, 71–77.
- 978 Krizek, D.T. (1978) Differential sensitivity of two cultivars of cucumber (*Cucumis sativus*  
979 L.) to increased UV-B irradiance. I. Dose-response studies. Final Report on Biological  
980 and Climatic Effects Research. USDA-EPA, Environmental Protection Agency,  
981 Washington, DC.
- 982 Krizek, D.T., Mirecki, R.M., & Kramer, G.F. (1994) Growth analysis of UV-B irradiated  
983 cucumber seedlings as influenced by photosynthetic photon flux source and cultivar.  
984 *Physiologia Plantarum*, 90, 593–599.
- 985 Krizek, D.T., Mirecki, R.M., Britz, S.J. (1997) Inhibitory effects of ambient levels of solar  
986 UV-A and UV-B radiation on growth of cucumber. *Physiologia Plantarum*, 100, 886–  
987 893.
- 988 Krizek, D. T. (2004) Influence of PAR and UV-A in determining plant sensitivity and  
989 photomorphogenic responses to UV-B radiation. *Photochemistry and Photobiology*, 79,  
990 307-315.
- 991 Lake, J.A., Field, K.J., Davey, M.P., Berrling, D.J., & Lomax, B.H. (2009) Metabolomic and  
992 physiological responses reveal multi-phasic acclimation of *Arabidopsis thaliana* to  
993 chronic UV radiation. *Plant Cell and Environment*, 32, 1377-1389.
- 994 Liang, T., Mei, S., Shi, C., Yang Y., Peng Y., Ma L., Wang, F., Li, X., Huang, X., Yin, Y.,  
995 Liu, H. (2018) UVR8 interacts with BES1 and BIM1 to regulate transcription and  
996 photomorphogenesis in Arabidopsis. *Developmental Cell*, 44, 512-523.e5
- 997 Liu, F., & Stützel, H. (2004) Biomass partitioning, specific leaf area, and water use efficiency  
998 of vegetable amaranth (*Amaranthus* spp.) in response to drought stress. *Scientia*  
999 *Horticulturae*, 102, 15-27.
- 1000 Majer, P., & Hideg, É. (2012) Developmental stage is an important factor that determines the  
1001 antioxidant responses of young and old grapevine leaves under UV irradiation in a  
1002 greenhouse. *Plant Physiology and Biochemistry*, 50, 15-23.

- 1003 Martínez-Lüscher, J., Morales, F., Delrot, S., Sánchez-Díaz, M., Gómés, E., Aguirreolea, J.,  
1004 & Pascual, I. (2013) Short- and long-term physiological responses of grapevine leaves  
1005 to UV-B radiation. *Plant Science*, *213*, 114–122.
- 1006 Morales, L.O., Brosché, M., Vainonen, J., Jenkins, G.I., Wargent, J.J., Sipari, N., Strid, Å.,  
1007 Lindfors, A.V., Tegelberg, R., & Aphalo, P.J. (2013) Multiple roles for UV  
1008 RESISTANCE LOCUS8 in regulating gene expression and metabolite accumulation in  
1009 Arabidopsis under solar ultraviolet radiation. *Plant Physiology*, *161*, 744-759.
- 1010 Morgenstern, A., Ekholm, A., Scheewe, P., & Rumpunen, K. (2014) Changes in content of  
1011 major phenolic compounds during leaf development of sea buckthorn (*Hippophaë*  
1012 *rhamnoides* L.). *Agricultural and Food Science*, *23*, 207-219.
- 1013 Murali, N.S., & Teramura, A.H. (1986) Intraspecific differences in *Cucumis sativus*  
1014 sensitivity to ultraviolet-B radiation. *Physiologia Plantarum*, *68*, 673–677.
- 1015 Murchie, E.H., & Lawson, T. (2013) Chlorophyll fluorescence analysis: a guide to good  
1016 practice and understanding some new applications. *Journal of Experimental Botany*, *64*,  
1017 3983-3998.
- 1018 Paik, I., & Huq, E. (2019) Plant photoreceptors: Multi-functional sensory proteins and their  
1019 signaling networks. *Seminars in Cell and Developmental Biology*, *92*, 114-121.
- 1020 Pescheck F., Lohbeck K.T., Roleda M.Y., & Bilger W., 2014. UVB induced DNA and  
1021 photosystem II damage in two intertidal green macroalgae: distinct survival strategies in  
1022 UV-screening and non-screening *Chlorophyta*. *Journal of Photochemistry and*  
1023 *Photobiology B: Biology*, *132*, 85–93.
- 1024 Potters, G., Pasternak, T.P., Guisez, Y., Palme, K.J., & Jansen, M.A.K. (2007) Stress-induced  
1025 morphogenic responses: growing out of trouble? *Trends in Plant Science*, *12*, 98-105.
- 1026 Qian, M., Kalbina I., Rosenqvist, E., Jansen, M.A.K., Teng, Y., & Strid, Å. (2019) UV  
1027 regulates expression of phenylpropanoid biosynthesis genes in cucumber (*Cucumis*  
1028 *sativus* L.) in an organ and spectrum dependent manner. *Photochemical and*  
1029 *Photobiological Sciences*, *18*, 424–433.
- 1030 Qian, M., Rosenqvist, E., Flygare, A.-M., Kalbina, I., Teng Y., Jansen M.A.K., & Strid, Å.  
1031 (2020) UV-A light induces a robust and dwarfed phenotype in cucumber plants  
1032 (*Cucumis sativus* L.) without affecting fruit yield. *Scientia Horticulturae*, *263*, 109110
- 1033 Radziejwoski, A., Vlieghe, K., Lammens, T., Berckmans, B., Maes, S., Jansen, M.A.K.,  
1034 Knappe, C., Albert, A., Seidlitz, H.K., Bahnweg, G., Inzé, D., & De Veylder, L. (2011)  
1035 Atypical E2F activity coordinates PHR1 photolyase gene transcription with  
1036 endoreduplication onset. *EMBO Journal*, *30*, 355-363.

- 1037 Rai, N., Neugart S., Yan Y., Wang, F., Siipola, S.M., Lindfors, A.V., Winkler, J.B., Albert,  
1038 A., Brosché, M., Lehto, T., Morales, L.O., & Aphalo, P.J. (2019) How do  
1039 cryptochromes and UVR8 interact in natural and simulated sunlight? *Journal of*  
1040 *Experimental Botany*, 70, 4975–4990.
- 1041 Rai, N., O’Hara, A., Farkas, D., Safronov, O., Ratanasopa, K., Siipola, S., Wang, F.,  
1042 Lindfors, A., Sipari, N., Jenkins, G.I., Lehto T., Salojärvi, J., Brosché, M., Strid, Å.,  
1043 Aphalo, P.J., Morales, L.O. (2020) The photoreceptor UVR8 mediates the perception of  
1044 both UV-B and UV-A wavelengths up to 350 nm of sunlight with responsivity  
1045 moderated by cryptochromes. *Plant Cell and Environment*, 43, 1513-1527.
- 1046 Reifenrath, K., & Müller, C. (2007) Species-specific and leaf-age dependent effects of  
1047 ultraviolet radiation on two Brassicaceae. *Phytochemistry*, 68, 875-885.
- 1048 Robson, T.M., Hartikainen, S.M., & Aphalo, P.J. (2015a) How does solar ultraviolet-B  
1049 radiation improve drought tolerance of silver birch (*Betula pendula* Roth.) seedlings?.  
1050 *Plant Cell and Environment*, 38, 953-967.
- 1051 Robson, T.M., Klem, K., Urban, O., & Jansen, M.A.K. (2015b) Re-interpreting plant  
1052 morphological responses to UV-B radiation. *Plant Cell and Environment*, 38, 856-866.
- 1053 Rodríguez-Calzada, T., Qian, M., Strid, Å., Neugart, S., Schreiner, M., Torres-Pacheco, I., &  
1054 Guevara-Gonzales, R. (2019) Effect of UV-B radiation on morphology, phenolic  
1055 compound production, gene expression, and subsequent drought stress responses in chili  
1056 pepper (*Capsicum annuum* L.). *Plant Physiology and Biochemistry*, 134, 94-102.
- 1057 Sävenstrand, H., Brosché, M., & Strid, Å. (2004) Ultraviolet-B signalling: Arabidopsis  
1058 brassinosteroid mutants are defective in UV-B regulated defence gene expression. *Plant*  
1059 *Physiology and Biochemistry*, 42, 687-694.
- 1060 Sharma, A., Sharma, B., Hayes, S., Kerner, K., Hoecker, U., Jenkins, G.I. & Franklin, K.A.  
1061 (2019) UVR8 disrupts stabilisation of PIF5 by COP1 to inhibit plant stem elongation in  
1062 sunlight. *Nature Communications*, 10, 4417.
- 1063 Shinkle, J.R., Edwards, M.C., Koenig, A., Shaltz, A., & Barnes, P.W. (2010)  
1064 Photomorphogenic regulation of increases in UV-absorbing pigments in cucumber  
1065 (*Cucumis sativus*) and *Arabidopsis thaliana* seedlings induced by different UV-B and  
1066 UV-C wavebands. *Physiologia Plantarum*, 138, 113–121.
- 1067 van de Poll, W.H., Eggert, A., Buma, A.G.J., & Breeman, A.M. (2001) Effects of UV-B-  
1068 induced DNA damage and photoinhibition on growth of temperate marine red  
1069 macrophytes: habitat-related differences in UV-B tolerance. *Journal of Phycology*, 37, 30–  
1070 37.

- 1071 Vanhaelewyn, L., Prinsen, E., Van Der Straeten, D., & Vandebussche, F. (2016) Hormone-  
1072 controlled UV-B responses in plants. *Journal of Experimental Botany*, *67*, 4469-4482.
- 1073 Takeuchi, Y., Kubo, H., Kasahara, H. & Sasaki, T. (1996) Adaptive alterations in the  
1074 activities of scavengers of active oxygen in cucumber cotyledons irradiated with UV-B.  
1075 *Journal of Plant Physiology*, *147*, 589–592.
- 1076 Taylor, J.R. (1997) An Introduction to Error Analysis. The Study of Uncertainties in Physical  
1077 Measurements. 2nd Edition. USA: University Science Books, Sausalito, CA.
- 1078 Tossi, V., Lamattina, L., Jenkins, G.I., & Cassia, R.O. (2014) Ultraviolet-B-induced stomatal  
1079 closure in *Arabidopsis* is regulated by the UV RESISTANCE LOCUS8 photoreceptor in  
1080 a nitric oxide-dependent mechanism. *Plant Physiology*, *164*, 2220–2230.
- 1081 Wargent J.J., Gegas, V.C., Jenkins, G.I., Doonan, J.H., & Paul, N.D. (2009) UVR8 in  
1082 *Arabidopsis thaliana* regulates multiple aspects of cellular differentiation during leaf  
1083 development in response to ultraviolet B radiation. *New Phytologist*, *183*, 315-326.
- 1084 Yamasaki, S., Shimada, E., Kuwano, T., Kawano, T., & Noguchi, N. (2010) Continuous UV-  
1085 B irradiation induces endoreduplication and peroxidase activity in epidermal cells  
1086 surrounding trichomes on cucumber cotyledons. *Journal of Radiation Research*, *51*,  
1087 187–196.
- 1088 Yamasaki, S., Shigeto, H., Ashihara, Y., & Noguchi, N. (2014) Continuous long-term UV-B  
1089 irradiation reduces division and expansion of epidermal cells in true leaves but  
1090 accelerates developmental stages such as true leaf unfolding and male flower bud  
1091 production in cucumber (*Cucumis sativus*, L.) seedlings. *Environmental Control in*  
1092 *Biology*, *52*, 13–19.

1093

#### 1094 **Supporting information**

1095

1096 Additional supporting information may be found online in the Supporting Information section  
1097 at the end of this article.

1098
